# Supplementary material for: MicroRNA-877-5p Inhibits Cell Progression by Targeting FOXM1 in Lung Cancer
Source: Hindawi journal article supplement (doi:10.1155/2022/4256172), 2022-06-15
Supplement: f1 [file 4256172.f1.zip]

| miRDB     | miRDiP   | TargetScan | miRTarBase | Starbase |
|-----------|----------|------------|------------|----------|
| FGB       | PLEKHA3  | KIF6       | RPLP1      | ZFY      |
| FOXD4L5   | FOXM1    | SYT7       | LRRC57     | CLSTN1   |
| COL6A3    | TP53INP2 | COX20      | SYNPR      | DFFA     |
| C15orf40  | ANKFY1   | PDHB       | LETMD1     | HSPB7    |
| C5orf47   | AR       | KRAS       | GYLTL1B    | EPHA2    |
| DDO       | DYRK1A   | LIAS       | PTGFRN     | EMC1     |
| TTC14     | ZNF174   | CLTC       | MAPRE1     | LUZP1    |
| CEP350    | ELF1     | IGF2BP2    | NDE1       | ASAP3    |
| ATE1      | KATNBL1  | TMCC2      | TBCC       | HMGCL    |
| DEPDC4    | HAND2    | ISX        | TMEM167A   | GPATCH3  |
| FXR2      | KRAS     | CNP        | CDR2L      | SLC9A1   |
| CSNK1G3   | TMCC2    | WDR7       | EIF2AK2    | WASF2    |
| ITM2B     | YLP1     | VPS41      | PLK1       | TMEM200B |
| ATP11B    | FXR2     | FOXP4      | HMGB3      | SNRNP40  |
| VGLL3     | CDC40    | RFTN2      | PTP4A2     | C1orf216 |
| ESRP1     | SCN3A    | DCX        | FOXM1      | C1orf109 |
| KRTAP4-11 | SORBS3   | ZC3H6      | NFAT5      | EPHA10   |
| KRTAP4-9  | TMED7    | SHISA6     | RC3H1      | SCMH1    |
| ANO6      | CCN5     | KLHL24     | SEC16A     | HIVEP3   |
| LMBRD1    | HOXB8    | DNMT3A     | MC4R       | FOXJ3    |
| MAP7D3    | ATP2B1   | YPEL2      | NACA       | C1orf210 |
| ETFRF1    | NUP98    | WWC1       | ETS2       | SLC6A9   |
| KRTAP4-8  | GNB4     | ZBTB20     | INPP4A     | IPP      |
| SORBS3    | REV3L    | CDC40      | HSPA8      | PIK3R3   |
| C4orf33   | SLC03A1  | SBN01      | RNF126     | EFCAB14  |
| ZNF174    | KLHL24   | KLHL18     | DSCR3      | EPS15    |
| BTD       | LPCAT2   | TSPAN6     | ARHGEF6    | KTI12    |
| BAZ1A     | IGF2BP2  | FKBP5      | SEC24C     | CC2D1B   |
| GLDC      | EID1     | HNRNPC     | AP3S1      | SSBP3    |
| ZFYVE26   | ITM2B    | FXR2       | ZBTB11     | SERBP1   |
| GRK2      | BAZ2B    | CBFA2T3    | TET1       | GNG12    |
| ZNF264    | CSNK1G3  | CBL        | TUBB2B     | WLS      |
| CFHR5     | NCOR1    | ORC2       | RPL35      | ANKRD13C |
| TDRD1     | KRTAP4-9 | NEBL       | CHAMP1     | PTGER3   |
| CD01      | MN1      | KAT7       | FAM72A     | CTBS     |
| ATP2B1    | FKBP5    | MAT1A      | DDX47      | SYDE2    |
| PANK3     | LAMP2    | ATP2B1     | TMEM106B   | DBT      |
| ELF1      | BAZ1A    | SNX30      | INTS1      | EXTL2    |
| E2F5      | RFTN2    | SAP30L     | RNF167     | PSRC1    |
| EPDR1     | TMBIM6   | FAM204A    | C17orf51   | SORT1    |
| ASTN2     | NEBL     | CSNK1G3    | ARL9       | SIKE1    |
| GALR1     | NRK      | SESN3      | TOB2       | GDAP2    |
| LMAN1     | COL6A3   | SLC38A9    | TUBA1B     | WARS2    |
| ANKFY1    | ZBTB41   | KDM5C      | SHISA5     | PRKAB2   |
| STYK1     | DCX      | FSD1L      | MEF2D      | NBPF20   |
| BTN1A1    | DCAF12   | OTOF       | NELFE      | MCL1     |
| UBN2      | ZNF280C  | TENT2      | STAU1      | ENSA     |
| YLP1      | UBN2     | PLEKHG3    | CCND2      | CTSS     |
| TRIM10    | WASL     | ARHGAP19   | ECEL1      | CERS2    |
| ALDH5A1   | KAT7     | MTDH       | HNRNPUL1   | CDC42SE1 |

|           |          |          |           |          |
|-----------|----------|----------|-----------|----------|
| ZC3H12B   | PCDH19   | PDPN     | FBXL8     | RFX5     |
| TLL2      | TSPAN6   | ZNF280C  | RPS27     | SELENBP1 |
| PDE1C     | KLHL18   | SRPX2    | ND1       | TDRKH    |
| DPY30     | RALBP1   | AAK1     | RPL23A    | GATAD2B  |
| DYRK1A    | PFKM     | LPCAT2   | CAB39     | SLC39A1  |
| GFOD2     | VPS41    | DHTKD1   | SLC25A5   | ADAR     |
| HLA-DRA   | CREBRF   | RELCH    | RAB1B     | FAM189B  |
| LOX       | PDPN     | TP53INP2 | USP30     | ASH1L    |
| EEF1AKNMT | CBFA2T3  | HAND2    | UCHL1     | SMG5     |
| HELQ      | ADAMTSL1 | USP46    | ANP32A    | MEF2D    |
| CTBS      | ZFYVE26  | METTL22  | MEGF9     | CRABP2   |
| ZKSCAN2   | ARHGAP19 | VLDLR    | TCF25     | HDGF     |
| GNB4      | HNRNPC   | ZNF174   | TMEM30A   | SLAMF6   |
| POLQ      | ZBTB20   | PLPP3    | MTHFD1    | SLAMF1   |
| NME4      | KLHDC10  | SORBS3   | CHD8      | APOA2    |
| POU2F1    | PHTF2    | MCAM     | FAM122B   | SLC19A2  |
| KTI12     | CAP1     | EIF1AX   | USP33     | RC3H1    |
| OCSTAMP   | DHTKD1   | WTIP     | GORASP2   | STX6     |
| CDC40     | YAP1     | ATXN1L   | UBR4      | RGS16    |
| CDKN1B    | HSD11B1  | PLCE1    | GLUL      | EDEM3    |
| ADAMTSL1  | PHOX2B   | BAZ2B    | SLC25A1   | ZBTB41   |
| C14orf119 | RNF111   | ZNF827   | USP2      | PHLDA3   |
| SKA2      | FRMD3    | DTWD2    | PRND      | KDM5B    |
| RDX       | ITCH     | TCEANC2  | SQSTM1    | RAB1F    |
| OSTC      | NR4A3    | NMNAT2   | PPIL4     | PLEKHA6  |
| PHF8      | SMAP1    | NR4A3    | DGKD      | NUAK2    |
| HOXA10    | EGR1     | RNF152   | FOXC1     | IL10     |
| CNTN3     | FSD1L    | UBN2     | THRA      | YOD1     |
| PLEKHB1   | ZNF264   | SYNCRIP  | FAM171A1  | LPGAT1   |
| AMER1     | MACROD2  | SCN3A    | ERF       | BATF3    |
| TP53INP2  | RPS6KA3  | IL1RAPL1 | CSTB      | ANGEL2   |
| FSD1L     | RBM25    | PLEKHA3  | SIGMAR1   | GPATCH2  |
| CIP2A     | ITGB8    | KATNBL1  | PRCC      | WDR26    |
| CAMLG     | SEC63    | TPST2    | TMEM147   | ENAH     |
| KRAS      | YPEL2    | FAM167A  | HIST1H2BL | ACBD3    |
| ZNF596    | ZNF827   | BEND6    | LRRFIP1   | JMJD4    |
| SERPINB9  | DPY19L3  | TMED7    | LEPR      | C1orf35  |
| STARD7    | LCOR     | HOXB8    | UBE2N     | CCSAP    |
| PCDH19    | KPNA1    | DCAF12   | NOTCH2NL  | EGLN1    |
| STON2     | ETNK1    | SHISA9   | SREBF2    | TOMM20   |
| INPP4A    | SOBP     | XKRX     | MTMR3     | NID1     |
| MAPK8     | MACC1    | CDKN1B   | GNB2L1    | GREM2    |
| RIPOR2    | FOXP4    | FRMD3    | NR2F2     | CHML     |
| ATP7B     | DICER1   | YLP1M1   | EIF5A     | RER1     |
| GXYLT1    | CELF2    | SKIL     | SRRM2     | VAMP3    |
| ADAMTS3   | MTMR4    | PBRM1    | KIAA1147  | H6PD     |
| IRS2      | NAV1     | CD248    | CAMSAP1   | SPSB1    |
| SLC03A1   | ZFYVE28  | NCOR1    | CASC3     | NMNAT1   |
| FBXW7     | ASTN2    | COL6A3   | UBC       | KAZN     |
| HERC3     | RC3H1    | ELF1     | SLC25A3   | SPEN     |
| PHIP      | NSD2     | FOX1M1   | RNF41     | SZRD1    |

|          |               |          |          |            |
|----------|---------------|----------|----------|------------|
| CBLL1    | BTG2          | CAPN7    | SURF4    | ELOA       |
| KATNBL1  | C18orf25      | MTHFD1L  | LNPEP    | PNRC2      |
| SCN3A    | PRDM4         | PRMT6    | GRB10    | CLIC4      |
| APOBEC4  | ING3          | TWF2     | BRD2     | SELENON    |
| WWTR1    | LMBRD1        | PRDM4    | ZNF174   | PDIK1L     |
| CTTNBP2  | PHF8          | SLC03A1  | SAP18    | CEP85      |
| KLHL24   | WDFY1         | KRTAP4-9 | KMT2D    | DHDDS      |
| DPY19L3  | CBL           | AOX1     | MPI      | PPP1R8     |
| GPATCH2  | BRINP3        | HSD11B1  | MARCKS   | XKR8       |
| CCN5     | RAC1          | BAMBI    | PLD3     | ATP5IF1    |
| MACC1    | ENC1          | PFKM     | ATP50    | YTHDF2     |
| HAND2    | ZC3H6         | ANKFY1   | HIST1H3B | KPNA6      |
| AGL      | ESRP1         | PROSER2  | AKAP1    | RBBP4      |
| WDR31    | CDKN1B        | DPY19L3  | MLXIP    | S100BPB    |
| DDX52    | REEP1         | ADAMTSL1 | HUWE1    | ZMYM1      |
| MN1      | RUBCN         | ELOA     | TXN2     | AGO4       |
| SLC22A13 | SYNCRIP       | SIGLEC5  | WBP11    | AGO1       |
| LACTB    | KMT2C         | POLH     | PHPT1    | ZC3H12A    |
| FOXD4    | ORAI1         | NRK      | MAPK8    | CDCA8      |
| KPNA1    | WWC1          | CCN5     | PTDSS1   | AKIRIN1    |
| GABRG1   | TCEANC2       |          | ELF4     | CAP1       |
| CCDC34   | ISX           |          | TUBB     | EXO5       |
| KLHL18   | PHF3          |          | TAF11    | CTPS1      |
| TSPAN31  | CAMLG         |          | RPS6KB1  | NSUN4      |
| PDCL3    | STAMPB        |          | SLC39A1  | CMPK1      |
| ARFRP1   | CEP350        |          | ZNF280B  | CDKN2C     |
| ZNRF1    | HLA-DRA       |          | ZKSCAN8  | TCEANC2    |
| NDUFA8   | NMNAT2        |          | ACBD3    | PRKAA2     |
| RABGAP1L | MAN1A1        |          | AGO1     | NFIA       |
| TMEM144  | ORC2          |          | OTUD7B   | HS2ST1     |
| ALCAM    | ZYG11B        |          | UBL5     | LRRC8C     |
| IKZF4    | IRS2          |          | AFF1     | AGL        |
| RNF212B  | ADAR          |          | ZBTB38   | MFS14A     |
| ETNK1    | INPP4A        |          | PSMD11   | AC118553.2 |
| FOXD4L1  | STAG2         |          | IGF2     | PRMT6      |
| FRMD3    | RUFY3         |          | ADCY3    | STXBP3     |
| TMEM196  | PHIP          |          | TMX3     | CSF1       |
| FOXD4L3  | NIPA1         |          | NDUFB11  | DCLRE1B    |
| SNX30    | AUTS2         |          | ZNF283   | OLFML3     |
| FOXD4L6  | NRP2          |          | CMTM8    | PTGFRN     |
| STRAP    | EIF1AX        |          | NUCKS1   | MAN1A2     |
| TRPA1    | RP11-204N11.1 |          | RNASEK   | FAM72B     |
| BMPR2    | GABRG2        |          | ND2      | SEC22B     |
| ZPLD1    | AMOT          |          | PAPOLA   | RNF115     |
| DENND6A  | POU2F1        |          | FAM127A  | NBPF12     |
| GRIP2    | PCMTD1        |          | DNAJB9   | PIP5K1A    |
| ZNF626   | PIKFYVE       |          | PHLPP1   | ZNF687     |
| ITCH     | SLF2          |          | TEX264   | S100A9     |
| RAC1     | PDE4D         |          | CENPF    | SNAPIN     |
| MMP16    | MAP7D3        |          | SORBS3   | UBAP2L     |
| GABRA4   | AAK1          |          | PROX1    | RUSC1      |

|         |          |  |          |          |
|---------|----------|--|----------|----------|
| STXBP3  | MAP2K4   |  | SMCHD1   | LMNA     |
| PTH2R   | ALG9     |  | SMG1     | DUSP23   |
| PAIP1   | AMD1     |  | PI4K2A   | PEA15    |
| ZBTB41  | NEO1     |  | ACTA1    | UFC1     |
| PALM2   | CLTC     |  | ACTG1    | UHMK1    |
| VPS13C  | EMP1     |  | IGF2BP2  | RGS4     |
| PHTF2   | HERC3    |  | MTMR14   | POGK     |
| AFF3    | RCHY1    |  | LARP1    | TBX19    |
| STAMPB  | SPRED1   |  | TPP1     | PRRX1    |
| KLHDC10 | ASXL1    |  | THRAP3   | PRRC2C   |
| CDCA8   | SNX30    |  | ORC2     | METTL13  |
| ABHD10  | ELAVL1   |  | HADH     | TOR1AIP1 |
| RUBCN   | IL1RAP   |  | TMEM184B | QSOX1    |
| STK39   | ANTXR1   |  | ATP5G3   | XPR1     |
| ATP8A1  | SBN01    |  | HMGA1    | MR1      |
| TMCC2   | AOX1     |  | VDAC1    | IER5     |
| SHB     | ANKRD13C |  | FBX07    | LAMC1    |
| SP8     | PEG10    |  | EEF1A1   | C1orf21  |
| GPX1    | KTI12    |  | HAND1    | SWT1     |
| KLF8    | ATXN1L   |  | MICU1    | ODR4     |
| GOLGA1  | SHB      |  | CCNT2    | NR5A2    |
| LRRC32  | RUNX1T1  |  | SH3GL1   | CAMSAP2  |
| CABLES1 | KAT6B    |  | SRSF3    | NAV1     |
| GNRHR   | PRRC2C   |  | BTG2     | IPO9     |
| LMBRD2  | DTD2     |  | GINS4    | PPP1R12B |
| LPCAT2  | UTRN     |  | PNRC2    | BTG2     |
| ESYT3   | LNPK     |  | BTFL4    | ATP2B4   |
| BCL2L13 | C15orf40 |  | PGRMC1   | ZC3H11A  |
| GLIPR1  | PANK3    |  | YAP1     | ZBED6    |
| RNASE7  | SLC25A36 |  | VAMP8    | SOX13    |
| KCNJ15  | RFX5     |  | PCNA     | FAM72A   |
| STAC    | ZNRF1    |  | GNL1     | SRGAP2   |
| BCCIP   | KLF8     |  | THEM6    | RASSF5   |
| ZNF615  | SHISA6   |  | ZFP91    | PFKFB2   |
| TMEM50B |          |  | YOD1     | CD46     |
| ZNF69   |          |  | WASL     | HSD11B1  |
| NUFIP1  |          |  | RPS24    | DIEXF    |
| DCX     |          |  | NCBP2    | HHAT     |
| UPRT    |          |  | DNAJB4   | ATF3     |
| BLMH    |          |  | CDKN1B   | CENPF    |
| TMBIM6  |          |  | CD4      | C1orf115 |
| DHTKD1  |          |  | AMOTL2   | MARC1    |
| GSPT1   |          |  | AFF2     | MIA3     |
| EMP1    |          |  | KRAS     | FBX028   |
| FOXM1   |          |  | ZSCAN25  | ARF1     |
| SMAP1   |          |  | C12orf4  | IBA57    |
| PTPRG   |          |  | MRPL51   | RHOU     |
| ZBTB20  |          |  | MED18    | URB2     |
| PIK3AP1 |          |  | BCL2L2   | ZNF672   |
| IKZF1   |          |  | HOXA10   | ASB13    |
| KCNA1   |          |  | EIF1AX   | GDI2     |

|            |  |  |          |            |
|------------|--|--|----------|------------|
| FAM161A    |  |  | SERF2    | NMT2       |
| REEP1      |  |  | STOML1   | MKX        |
| PAK2       |  |  | CRCP     | KIF5B      |
| CUX1       |  |  | SPHAR    | ZNF33B     |
| CNTLN      |  |  | RAB4A    | CXCL12     |
| TMEM178B   |  |  | HYPK     | 8-Mar      |
| ELAC2      |  |  | CASP16   | ZFAND4     |
| AR         |  |  | SLC35E2  | ZWINT      |
| RNF168     |  |  | ZNF566   | IPMK       |
| THEM6      |  |  | COLEC10  | SLC16A9    |
| SLC25A21   |  |  | CELF1    | CCDC6      |
| PLEKHA3    |  |  | CECR2    | RUFY2      |
| GNAZ       |  |  | AGO3     | DNA2       |
| NDUFA4     |  |  | COLEC12  | AIFM2      |
| KCTD18     |  |  | ARHGDIA  | LRRC20     |
| HOXB8      |  |  | HSPA12B  | ANXA7      |
| FGF14      |  |  | TMEM170B | USP54      |
| DLG2       |  |  | DNAH100S | NDST2      |
| CLEC5A     |  |  | RNF8     | AC022400.6 |
| GON7       |  |  | RELA     | AP3M1      |
| CD302      |  |  | FAM213A  | PPP1R3C    |
| SYNPO      |  |  | GATSL2   | FGFBP3     |
| NAV1       |  |  | TTC28    | IDE        |
| ZNF326     |  |  | CYB561   | PIK3AP1    |
| LY75-CD302 |  |  | AQP3     | ARHGAP19   |
| SLF2       |  |  | CYB561   | MORN4      |
| TENT5A     |  |  | TMEM170B | CHUK       |
| ZNF519     |  |  | TTC28    | NDUFB8     |
| SUCNR1     |  |  | RELA     | POLL       |
| ZYG11B     |  |  | GATSL2   | MGEA5      |
| NDST3      |  |  | TMEM170B | LDB1       |
| GCSAM      |  |  | FAM213A  | SH3PXD2A   |
| MMRN1      |  |  | RELA     | GPAM       |
| GRAMD2A    |  |  | RNF8     | CCDC186    |
| ZNF280C    |  |  | DNAH100S | RAB11FIP2  |
| KRIT1      |  |  | TMEM170B | PRDX3      |
| TRMT6      |  |  | HSPA12B  | CHST15     |
| ZNF440     |  |  | CDKN1B   | OAT        |
| AMD1       |  |  | MRPL51   | FAM53B     |
| IMPACT     |  |  | ARHGDIA  | CELF2      |
| PHF14      |  |  | HOXA10   | DHTKD1     |
| IGF1R      |  |  | CDKN1B   | PTER       |
| HGF        |  |  | VAMP8    | ARL5B      |
| MAN1A1     |  |  | YAP1     | MAP3K8     |
| YAP1       |  |  | COLEC12  | CCDC7      |
| VKORC1L1   |  |  | EIF1AX   | ZNF33A     |
| PTK7       |  |  | HOXA10   | MAPK8      |
| C10orf111  |  |  | PGRMC1   | ARID5B     |
| ASB11      |  |  | PNRC2    | ZNF365     |
| IL2RA      |  |  | PCNA     | EIF4EBP2   |
| PNPO       |  |  | GINS4    | ANAPC16    |

|          |  |  |         |          |
|----------|--|--|---------|----------|
| ZNF14    |  |  | COLEC12 | VCL      |
| CACNA2D2 |  |  | EIF1AX  | KAT6B    |
| XBP1     |  |  | PCNA    | ZMZ1     |
| XDH      |  |  | AGO3    | FAM213A  |
| DCAF12   |  |  | CDKN1B  | FAS      |
| HSP90AA1 |  |  | CECR2   | IFIT2    |
| ADCY2    |  |  | CELF1   | TNKS2    |
| TP53I11  |  |  | COLEC10 | 5-Mar    |
| CD44     |  |  | ZNF566  | EXOC6    |
| ZPR1     |  |  | SLC35E2 | SLC35G1  |
| RFTN2    |  |  | BCL2L2  | SLF2     |
| FZD5     |  |  | CASP16  | TWNK     |
| ODAPH    |  |  | EIF1AX  | NOLC1    |
| BROX     |  |  | HOXA10  | MFSD13A  |
| VPS41    |  |  | HYPK    | TRIM8    |
| ITGB6    |  |  | RAB4A   | WBP1L    |
| KSR2     |  |  | SPHAR   | ADD3     |
| PXK      |  |  | MED18   | ADRA2A   |
| SC5D     |  |  | CRCP    | TDRD1    |
| UNC13C   |  |  | STOML1  | FAM160B1 |
| BCL2L15  |  |  | SERF2   | TRUB1    |
| SERF2    |  |  | CDKN1B  | INPP5F   |
| GTF3C4   |  |  | ZSCAN25 | PLEKHA1  |
| NCOR1    |  |  | EIF1AX  | BCCIP    |
| OCRL     |  |  | HOXA10  | SIRT3    |
| CCDC174  |  |  | BCL2L2  | GATD1    |
| MEGF9    |  |  | MED18   | OSBPL5   |
| PAX9     |  |  | PCNA    | NUP98    |
| SKIL     |  |  | MRPL51  | TRIM3    |
| PTCHD4   |  |  | C12orf4 | ARFIP2   |
| OGA      |  |  | ZSCAN25 | TPP1     |
| GALNT10  |  |  | GINS4   | DENND5A  |
| MAPK8IP2 |  |  | KRAS    | EIF4G2   |
| DKK2     |  |  | THEM6   | PLEKHA7  |
| BTG2     |  |  | AFF2    | E2F8     |
| SPRED1   |  |  | PCNA    | SVIP     |
| HTR2A    |  |  | AFF2    | CCDC34   |
| NRG4     |  |  | PCNA    | CSTF3    |
| TREM1    |  |  | AMOTL2  | SLC1A2   |
| TM4SF1   |  |  | BTF3L4  | TRAF6    |
| PRPS2    |  |  | BTG2    | TP53I11  |
| ZNF346   |  |  | CD4     | CELF1    |
| NSF      |  |  | CDKN1B  | PATL1    |
| UTS2     |  |  | DNAJB4  | TMEM223  |
| ITGB8    |  |  | NCBP2   | MEN1     |
| ZNF91    |  |  | RNF126  | FOSL1    |
| ZDHHC15  |  |  | RPS24   | EIF1AD   |
| CLEC7A   |  |  | WASL    | SPTBN2   |
| VWA5A    |  |  | YOD1    | ALDH3B2  |
| EPB41L5  |  |  | ZFP91   | KMT5B    |
| HAUS6    |  |  | THEM6   | FAM168A  |

|          |  |  |       |             |
|----------|--|--|-------|-------------|
| TOR1AIP1 |  |  | SRSF3 | XRRA1       |
| EHMT1    |  |  | GNL1  | CCDC90B     |
| SEC22A   |  |  | PCNA  | RAB38       |
| FKBP5    |  |  |       | CTSC        |
| SERINC3  |  |  |       | SESN3       |
| GCFC2    |  |  |       | MMP1        |
| MYLK4    |  |  |       | MSANTD4     |
| TMEM132B |  |  |       | KDELC2      |
| FAM83A   |  |  |       | PPP2R1B     |
| SMG5     |  |  |       | ALG9        |
| BAZ2B    |  |  |       | CADM1       |
| DDX6     |  |  |       | ZPR1        |
| GDPD1    |  |  |       | DPAGT1      |
| IRF1     |  |  |       | MCAM        |
| GDAP1L1  |  |  |       | NECTIN1     |
| C22orf46 |  |  |       | ZNF202      |
| NIPA1    |  |  |       | SRPRA       |
| AICF     |  |  |       | MUC5B       |
| ZNF365   |  |  |       | STIM1       |
| APLNR    |  |  |       | TIMM10B     |
| PKHD1    |  |  |       | TUB         |
| SCUBE3   |  |  |       | RPL27A      |
| RBM25    |  |  |       | PARVA       |
| MAP3K19  |  |  |       | TEAD1       |
| ZNF33A   |  |  |       | C11orf58    |
| AIFM2    |  |  |       | NCR3LG1     |
| AFTPH    |  |  |       | CAPRIN1     |
| ADARB2   |  |  |       | EHF         |
| ARHGAP19 |  |  |       | CD44        |
| ANTXR1   |  |  |       | TRIM44      |
| ZNF597   |  |  |       | LDLRAD3     |
| ZNF585B  |  |  |       | API5        |
| NMNAT1   |  |  |       | SLC35C1     |
| AQP3     |  |  |       | ATG13       |
| NFATC2   |  |  |       | SLC39A13    |
| IPMK     |  |  |       | CLP1        |
| PEG10    |  |  |       | ZDHHC5      |
| NRK      |  |  |       | SELENOH     |
| RHOQ     |  |  |       | AP001931. 1 |
| ASXL3    |  |  |       | CTNND1      |
| CACNA1C  |  |  |       | ZFP91       |
| ARRDC4   |  |  |       | TKFC        |
| ACHE     |  |  |       | ESRRA       |
| GABRG2   |  |  |       | PPP2R5B     |
| CXorf67  |  |  |       | SNX15       |
| CTPS1    |  |  |       | ARL2-SNX15  |
| ZNF689   |  |  |       | DPF2        |
| SEPHS2   |  |  |       | BANF1       |
| ZNF317   |  |  |       | PACS1       |
|          |  |  |       | RAB1B       |
|          |  |  |       | RBM14       |

|  |  |  |          |
|--|--|--|----------|
|  |  |  | KDM2A    |
|  |  |  | GRK2     |
|  |  |  | PPP6R3   |
|  |  |  | CTTN     |
|  |  |  | RNF121   |
|  |  |  | ARHGEF17 |
|  |  |  | PLEKHB1  |
|  |  |  | RNF169   |
|  |  |  | TSKU     |
|  |  |  | TMEM126B |
|  |  |  | TMEM135  |
|  |  |  | PIWIL4   |
|  |  |  | FUT4     |
|  |  |  | AMOTL1   |
|  |  |  | SRSF8    |
|  |  |  | C11orf70 |
|  |  |  | YAP1     |
|  |  |  | AASDHPPT |
|  |  |  | DIXDC1   |
|  |  |  | DLAT     |
|  |  |  | RBM7     |
|  |  |  | SIDT2    |
|  |  |  | TAGLN    |
|  |  |  | ARCN1    |
|  |  |  | HINFP    |
|  |  |  | NLRX1    |
|  |  |  | CBL      |
|  |  |  | VWA5A    |
|  |  |  | FLI1     |
|  |  |  | APLP2    |
|  |  |  | VPS26B   |
|  |  |  | KDM5A    |
|  |  |  | FOXM1    |
|  |  |  | C12orf4  |
|  |  |  | SCNN1A   |
|  |  |  | MRPL51   |
|  |  |  | ZNF384   |
|  |  |  | C1RL     |
|  |  |  | RERG     |
|  |  |  | KRAS     |
|  |  |  | GXYLT1   |
|  |  |  | SCAF11   |
|  |  |  | SLC38A1  |
|  |  |  | SLC38A2  |
|  |  |  | HDAC7    |
|  |  |  | ARF3     |
|  |  |  | RHEBL1   |
|  |  |  | LMBR1L   |
|  |  |  | LIMA1    |
|  |  |  | FIGNL2   |
|  |  |  | KRT80    |



|  |  |  |  |           |
|--|--|--|--|-----------|
|  |  |  |  | SPRYD3    |
|  |  |  |  | RARG      |
|  |  |  |  | ANKRD52   |
|  |  |  |  | TIMELESS  |
|  |  |  |  | B4GALNT1  |
|  |  |  |  | PPM1H     |
|  |  |  |  | KRR1      |
|  |  |  |  | LIN7A     |
|  |  |  |  | ATP2B1    |
|  |  |  |  | TMCC3     |
|  |  |  |  | NTN4      |
|  |  |  |  | ARL1      |
|  |  |  |  | GNPTAB    |
|  |  |  |  | SLC41A2   |
|  |  |  |  | PRDM4     |
|  |  |  |  | GIT2      |
|  |  |  |  | NAA25     |
|  |  |  |  | RASAL1    |
|  |  |  |  | WSB2      |
|  |  |  |  | GCN1      |
|  |  |  |  | KDM2B     |
|  |  |  |  | RSRC2     |
|  |  |  |  | SBN01     |
|  |  |  |  | SCARB1    |
|  |  |  |  | SLC15A4   |
|  |  |  |  | DDX51     |
|  |  |  |  | POLE      |
|  |  |  |  | ERC1      |
|  |  |  |  | ADIPOR2   |
|  |  |  |  | LTBR      |
|  |  |  |  | CD4       |
|  |  |  |  | ATN1      |
|  |  |  |  | NECAP1    |
|  |  |  |  | GABARAPL1 |
|  |  |  |  | CDKN1B    |
|  |  |  |  | APOLD1    |
|  |  |  |  | DDX47     |
|  |  |  |  | GPRC5A    |
|  |  |  |  | FAM234B   |
|  |  |  |  | EMP1      |
|  |  |  |  | STRAP     |
|  |  |  |  | PDE3A     |
|  |  |  |  | ETNK1     |
|  |  |  |  | ETFRF1    |
|  |  |  |  | STK38L    |
|  |  |  |  | KLHL42    |
|  |  |  |  | FAR2      |
|  |  |  |  | ALG10B    |
|  |  |  |  | PPHLN1    |
|  |  |  |  | IRAK4     |
|  |  |  |  | TMEM117   |

|  |  |  |  |         |
|--|--|--|--|---------|
|  |  |  |  | PFKM    |
|  |  |  |  | SPATS2  |
|  |  |  |  | KCNH3   |
|  |  |  |  | TMBIM6  |
|  |  |  |  | SMARCD1 |
|  |  |  |  | DIP2B   |
|  |  |  |  | LETMD1  |
|  |  |  |  | ACVRL1  |
|  |  |  |  | NR4A1   |
|  |  |  |  | ATG101  |
|  |  |  |  | EIF4B   |
|  |  |  |  | HOXC11  |
|  |  |  |  | HOXC8   |
|  |  |  |  | COPZ1   |
|  |  |  |  | RAB5B   |
|  |  |  |  | IKZF4   |
|  |  |  |  | MYL6    |
|  |  |  |  | SPRYD4  |
|  |  |  |  | TSPAN31 |
|  |  |  |  | SLC16A7 |
|  |  |  |  | SRGAP1  |
|  |  |  |  | TBK1    |
|  |  |  |  | DYRK2   |
|  |  |  |  | FRS2    |
|  |  |  |  | THAP2   |
|  |  |  |  | NAV3    |
|  |  |  |  | MRPL42  |
|  |  |  |  | METAP2  |
|  |  |  |  | TDG     |
|  |  |  |  | UBE3B   |
|  |  |  |  | PTPN11  |
|  |  |  |  | OAS3    |
|  |  |  |  | OAS2    |
|  |  |  |  | RITA1   |
|  |  |  |  | RNF10   |
|  |  |  |  | MLEC    |
|  |  |  |  | ORAI1   |
|  |  |  |  | BCL7A   |
|  |  |  |  | EP400   |
|  |  |  |  | XPO4    |
|  |  |  |  | RNF6    |
|  |  |  |  | FOXO1   |
|  |  |  |  | ELF1    |
|  |  |  |  | KBTBD7  |
|  |  |  |  | NUFIP1  |
|  |  |  |  | INTS6   |
|  |  |  |  | ATP7B   |
|  |  |  |  | VPS36   |
|  |  |  |  | DIAPH3  |
|  |  |  |  | KCTD12  |
|  |  |  |  | ABCC4   |

|  |  |  |            |
|--|--|--|------------|
|  |  |  | STK24      |
|  |  |  | IRS2       |
|  |  |  | COL4A1     |
|  |  |  | PAN3       |
|  |  |  | FREM2      |
|  |  |  | SLC25A15   |
|  |  |  | AKAP11     |
|  |  |  | ITM2B      |
|  |  |  | TRIM13     |
|  |  |  | CKAP2      |
|  |  |  | BIVM       |
|  |  |  | ERCC5      |
|  |  |  | BIVM-ERCC5 |
|  |  |  | ING1       |
|  |  |  | CUL4A      |
|  |  |  | TMC03      |
|  |  |  | HNRNPC     |
|  |  |  | CHD8       |
|  |  |  | RAB2B      |
|  |  |  | RBM23      |
|  |  |  | PSMB5      |
|  |  |  | ZFHX2      |
|  |  |  | SDR39U1    |
|  |  |  | DTD2       |
|  |  |  | EGLN3      |
|  |  |  | BAZ1A      |
|  |  |  | RALGAPA1   |
|  |  |  | CLEC14A    |
|  |  |  | MAP4K5     |
|  |  |  | NID2       |
|  |  |  | GNPNAT1    |
|  |  |  | DDHD1      |
|  |  |  | EXOC5      |
|  |  |  | GPR135     |
|  |  |  | SIX4       |
|  |  |  | RAB15      |
|  |  |  | MAX        |
|  |  |  | ZFYVE26    |
|  |  |  | ELMSAN1    |
|  |  |  | AREL1      |
|  |  |  | PGF        |
|  |  |  | TGFB3      |
|  |  |  | VIPAS39    |
|  |  |  | ALKBH1     |
|  |  |  | GTF2A1     |
|  |  |  | GALC       |
|  |  |  | GON7       |
|  |  |  | BTBD7      |
|  |  |  | DICER1     |
|  |  |  | ATG2B      |
|  |  |  | BCL11B     |

|  |  |  |  |             |
|--|--|--|--|-------------|
|  |  |  |  | SLC25A29    |
|  |  |  |  | HSP90AA1    |
|  |  |  |  | ARHGEF40    |
|  |  |  |  | ABHD4       |
|  |  |  |  | LRP10       |
|  |  |  |  | BCL2L2      |
|  |  |  |  | NGDN        |
|  |  |  |  | THTPA       |
|  |  |  |  | DCAF11      |
|  |  |  |  | PSME1       |
|  |  |  |  | NPAS3       |
|  |  |  |  | FAM177A1    |
|  |  |  |  | KIAA0391    |
|  |  |  |  | AL121594. 1 |
|  |  |  |  | PAX9        |
|  |  |  |  | LRFN5       |
|  |  |  |  | KLHDC2      |
|  |  |  |  | GNG2        |
|  |  |  |  | MAPK1IP1L   |
|  |  |  |  | DAAM1       |
|  |  |  |  | PPM1A       |
|  |  |  |  | PRKCH       |
|  |  |  |  | AKAP5       |
|  |  |  |  | FNTB        |
|  |  |  |  | SLC39A9     |
|  |  |  |  | SUSD6       |
|  |  |  |  | TTC9        |
|  |  |  |  | SIPA1L1     |
|  |  |  |  | RBM25       |
|  |  |  |  | FCF1        |
|  |  |  |  | YLPM1       |
|  |  |  |  | DLST        |
|  |  |  |  | CALM1       |
|  |  |  |  | UBR7        |
|  |  |  |  | OTUB2       |
|  |  |  |  | PPP2R5C     |
|  |  |  |  | RCOR1       |
|  |  |  |  | TNFAIP2     |
|  |  |  |  | EIF5        |
|  |  |  |  | TRMT61A     |
|  |  |  |  | KLC1        |
|  |  |  |  | AL139300. 1 |
|  |  |  |  | ZFYVE21     |
|  |  |  |  | INF2        |
|  |  |  |  | NIPA1       |
|  |  |  |  | KATNBL1     |
|  |  |  |  | SLC12A6     |
|  |  |  |  | ZNF770      |
|  |  |  |  | DPH6        |
|  |  |  |  | FSIP1       |
|  |  |  |  | RMDN3       |

|  |  |  |  |           |
|--|--|--|--|-----------|
|  |  |  |  | RHOV      |
|  |  |  |  | ZNF106    |
|  |  |  |  | LCMT2     |
|  |  |  |  | CATSPER2  |
|  |  |  |  | SHC4      |
|  |  |  |  | SECISBP2L |
|  |  |  |  | GABPB1    |
|  |  |  |  | ARPP19    |
|  |  |  |  | ALDH1A2   |
|  |  |  |  | RORA      |
|  |  |  |  | CA12      |
|  |  |  |  | IGDCC3    |
|  |  |  |  | INTS14    |
|  |  |  |  | CLN6      |
|  |  |  |  | ITGA11    |
|  |  |  |  | MYO9A     |
|  |  |  |  | ULK3      |
|  |  |  |  | SCAMP2    |
|  |  |  |  | ETFA      |
|  |  |  |  | PEAK1     |
|  |  |  |  | HOMER2    |
|  |  |  |  | C15orf40  |
|  |  |  |  | WDR73     |
|  |  |  |  | MFGE8     |
|  |  |  |  | PEX11A    |
|  |  |  |  | SELENOS   |
|  |  |  |  | TUBGCP5   |
|  |  |  |  | SPRED1    |
|  |  |  |  | DISP2     |
|  |  |  |  | RTF1      |
|  |  |  |  | SERF2     |
|  |  |  |  | EID1      |
|  |  |  |  | DTWD1     |
|  |  |  |  | RNF111    |
|  |  |  |  | C2CD4A    |
|  |  |  |  | LACTB     |
|  |  |  |  | RAB8B     |
|  |  |  |  | SNX1      |
|  |  |  |  | ZNF609    |
|  |  |  |  | THSD4     |
|  |  |  |  | BBS4      |
|  |  |  |  | NEO1      |
|  |  |  |  | ARID3B    |
|  |  |  |  | CLK3      |
|  |  |  |  | DNAJA4    |
|  |  |  |  | IREB2     |
|  |  |  |  | HYKK      |
|  |  |  |  | FAM103A1  |
|  |  |  |  | ZNF592    |
|  |  |  |  | AKAP13    |
|  |  |  |  | ABHD2     |

|  |  |  |             |
|--|--|--|-------------|
|  |  |  | ZNF710      |
|  |  |  | IQGAP1      |
|  |  |  | BLM         |
|  |  |  | FURIN       |
|  |  |  | NR2F2       |
|  |  |  | ARRDC4      |
|  |  |  | IGF1R       |
|  |  |  | RPUSD1      |
|  |  |  | CASKIN1     |
|  |  |  | PRSS22      |
|  |  |  | ZNF200      |
|  |  |  | ADCY9       |
|  |  |  | CORO7-PAM16 |
|  |  |  | PAM16       |
|  |  |  | USP7        |
|  |  |  | GSPT1       |
|  |  |  | RRN3        |
|  |  |  | MARF1       |
|  |  |  | SMG1        |
|  |  |  | EARS2       |
|  |  |  | ZKSCAN2     |
|  |  |  | SEPHS2      |
|  |  |  | ZNF689      |
|  |  |  | ZNF629      |
|  |  |  | NUDT21      |
|  |  |  | CMTM4       |
|  |  |  | KCTD19      |
|  |  |  | ATP6VOD1    |
|  |  |  | SLC7A6OS    |
|  |  |  | CHTF8       |
|  |  |  | VAC14       |
|  |  |  | GLG1        |
|  |  |  | RFWD3       |
|  |  |  | GINS2       |
|  |  |  | CBFA2T3     |
|  |  |  | CHMP1A      |
|  |  |  | FANCA       |
|  |  |  | NME4        |
|  |  |  | PIGQ        |
|  |  |  | RAB40C      |
|  |  |  | CACNA1H     |
|  |  |  | JPT2        |
|  |  |  | TRAF7       |
|  |  |  | PDPK1       |
|  |  |  | ZNF174      |
|  |  |  | GLIS2       |
|  |  |  | MGRN1       |
|  |  |  | PMM2        |
|  |  |  | ATF7IP2     |
|  |  |  | RMI2        |
|  |  |  | SHISA9      |

|  |  |  |  |          |
|--|--|--|--|----------|
|  |  |  |  | ITPRIPL2 |
|  |  |  |  | VPS35L   |
|  |  |  |  | ANKS4B   |
|  |  |  |  | EEF2K    |
|  |  |  |  | TAOK2    |
|  |  |  |  | FBR5     |
|  |  |  |  | SRCAP    |
|  |  |  |  | GPT2     |
|  |  |  |  | CHD9     |
|  |  |  |  | FTO      |
|  |  |  |  | ARL2BP   |
|  |  |  |  | KATNB1   |
|  |  |  |  | PDP2     |
|  |  |  |  | CBFB     |
|  |  |  |  | SLC9A5   |
|  |  |  |  | THAP11   |
|  |  |  |  | EDC4     |
|  |  |  |  | PLA2G15  |
|  |  |  |  | HAS3     |
|  |  |  |  | SNTB2    |
|  |  |  |  | NFAT5    |
|  |  |  |  | WWP2     |
|  |  |  |  | ATXN1L   |
|  |  |  |  | ZNRF1    |
|  |  |  |  | MON1B    |
|  |  |  |  | KIAA0513 |
|  |  |  |  | FOXF1    |
|  |  |  |  | MAP1LC3B |
|  |  |  |  | CDT1     |
|  |  |  |  | ZNF276   |
|  |  |  |  | ABR      |
|  |  |  |  | MYO1C    |
|  |  |  |  | ANKFY1   |
|  |  |  |  | UBE2G1   |
|  |  |  |  | SLC25A11 |
|  |  |  |  | DERL2    |
|  |  |  |  | ZBTB4    |
|  |  |  |  | FXR2     |
|  |  |  |  | VAMP2    |
|  |  |  |  | MYH10    |
|  |  |  |  | ELAC2    |
|  |  |  |  | NCOR1    |
|  |  |  |  | FAM222B  |
|  |  |  |  | FLOT2    |
|  |  |  |  | PHF12    |
|  |  |  |  | BLMH     |
|  |  |  |  | RFFL     |
|  |  |  |  | RAD51D   |
|  |  |  |  | ACACA    |
|  |  |  |  | DDX52    |
|  |  |  |  | PIP4K2B  |

|  |  |  |            |
|--|--|--|------------|
|  |  |  | MED1       |
|  |  |  | PGAP3      |
|  |  |  | MED24      |
|  |  |  | STAT5B     |
|  |  |  | VAT1       |
|  |  |  | ATXN7L3    |
|  |  |  | DCAKD      |
|  |  |  | PLEKHM1    |
|  |  |  | KANSL1     |
|  |  |  | ZNF652     |
|  |  |  | SPAG9      |
|  |  |  | MBTD1      |
|  |  |  | SUPT4H1    |
|  |  |  | MTMR4      |
|  |  |  | SKA2       |
|  |  |  | CYB561     |
|  |  |  | LIMD2      |
|  |  |  | SMARCD2    |
|  |  |  | TEX2       |
|  |  |  | SLC16A6    |
|  |  |  | GGA3       |
|  |  |  | H3F3B      |
|  |  |  | RNF157     |
|  |  |  | CBX4       |
|  |  |  | NPLOC4     |
|  |  |  | ARHGDIA    |
|  |  |  | RAB40B     |
|  |  |  | DPH1       |
|  |  |  | OVCA2      |
|  |  |  | SGSM2      |
|  |  |  | PAFAH1B1   |
|  |  |  | RAP1GAP2   |
|  |  |  | PLD2       |
|  |  |  | USP6       |
|  |  |  | RPAIN      |
|  |  |  | RNASEK     |
|  |  |  | MPDU1      |
|  |  |  | WRAP53     |
|  |  |  | EFNB3      |
|  |  |  | KDM6B      |
|  |  |  | CYB5D1     |
|  |  |  | MAP2K4     |
|  |  |  | COX10      |
|  |  |  | AC098850.3 |
|  |  |  | RAI1       |
|  |  |  | SMCR8      |
|  |  |  | EPN2       |
|  |  |  | ALDH3A2    |
|  |  |  | MAP2K3     |
|  |  |  | WSB1       |
|  |  |  | NLK        |



|  |  |  |  |          |
|--|--|--|--|----------|
|  |  |  |  | TMEM97   |
|  |  |  |  | TMEM199  |
|  |  |  |  | TRAF4    |
|  |  |  |  | ERAL1    |
|  |  |  |  | TAOK1    |
|  |  |  |  | RNF135   |
|  |  |  |  | NF1      |
|  |  |  |  | SUZ12    |
|  |  |  |  | ZNF207   |
|  |  |  |  | CDK5R1   |
|  |  |  |  | LASP1    |
|  |  |  |  | RAPGEFL1 |
|  |  |  |  | FKBP10   |
|  |  |  |  | CNP      |
|  |  |  |  | CNTNAP1  |
|  |  |  |  | RUNDC1   |
|  |  |  |  | RND2     |
|  |  |  |  | TMUB2    |
|  |  |  |  | NSF      |
|  |  |  |  | GOSR2    |
|  |  |  |  | PNPO     |
|  |  |  |  | IGF2BP1  |
|  |  |  |  | KAT7     |
|  |  |  |  | RSAD1    |
|  |  |  |  | TOM1L1   |
|  |  |  |  | STXBP4   |
|  |  |  |  | MSI2     |
|  |  |  |  | PPM1E    |
|  |  |  |  | YPEL2    |
|  |  |  |  | CLTC     |
|  |  |  |  | METTL2A  |
|  |  |  |  | TANC2    |
|  |  |  |  | DCAF7    |
|  |  |  |  | PSMC5    |
|  |  |  |  | PRKCA    |
|  |  |  |  | BPTF     |
|  |  |  |  | KCTD2    |
|  |  |  |  | SEC14L1  |
|  |  |  |  | BIRC5    |
|  |  |  |  | ENGASE   |
|  |  |  |  | CBX2     |
|  |  |  |  | GAA      |
|  |  |  |  | RNF213   |
|  |  |  |  | ENDOV    |
|  |  |  |  | HGS      |
|  |  |  |  | FOXK2    |
|  |  |  |  | YES1     |
|  |  |  |  | LPIN2    |
|  |  |  |  | PTPN2    |
|  |  |  |  | ESCO1    |
|  |  |  |  | TMEM241  |

|  |  |  |          |
|--|--|--|----------|
|  |  |  | DSC3     |
|  |  |  | ZNF24    |
|  |  |  | EPG5     |
|  |  |  | ATP5F1A  |
|  |  |  | SMAD2    |
|  |  |  | ZBTB7C   |
|  |  |  | TCF4     |
|  |  |  | LMAN1    |
|  |  |  | CCBE1    |
|  |  |  | CDH19    |
|  |  |  | MBP      |
|  |  |  | ANKRD12  |
|  |  |  | TWSG1    |
|  |  |  | RALBP1   |
|  |  |  | RAB31    |
|  |  |  | RNMT     |
|  |  |  | CABLES1  |
|  |  |  | IMPACT   |
|  |  |  | MAPRE2   |
|  |  |  | PIK3C3   |
|  |  |  | C18orf25 |
|  |  |  | ONECUT2  |
|  |  |  | SERPINB5 |
|  |  |  | SERPINB8 |
|  |  |  | MBD3     |
|  |  |  | MKNK2    |
|  |  |  | TIMM13   |
|  |  |  | DIRAS1   |
|  |  |  | AES      |
|  |  |  | SH3GL1   |
|  |  |  | DPP9     |
|  |  |  | SLC25A23 |
|  |  |  | ELAVL1   |
|  |  |  | ZNF562   |
|  |  |  | CDC37    |
|  |  |  | TMED1    |
|  |  |  | RAB3D    |
|  |  |  | ZNF823   |
|  |  |  | PRKACA   |
|  |  |  | ASF1B    |
|  |  |  | BRD4     |
|  |  |  | AKAP8    |
|  |  |  | FKBP8    |
|  |  |  | GDF1     |
|  |  |  | CERS1    |
|  |  |  | ZNF14    |
|  |  |  | ZNF626   |
|  |  |  | ZNF91    |
|  |  |  | HSPB6    |
|  |  |  | ZNF566   |
|  |  |  | ZNF585A  |

|  |  |  |             |
|--|--|--|-------------|
|  |  |  | ZNF573      |
|  |  |  | C19orf47    |
|  |  |  | C19orf54    |
|  |  |  | ZNF235      |
|  |  |  | IRF2BP1     |
|  |  |  | NOVA2       |
|  |  |  | STRN4       |
|  |  |  | ZC3H4       |
|  |  |  | ZNF615      |
|  |  |  | ZNF28       |
|  |  |  | ZNF154      |
|  |  |  | ZNF417      |
|  |  |  | HCN2        |
|  |  |  | PTBP1       |
|  |  |  | CCDC94      |
|  |  |  | FEM1A       |
|  |  |  | KDM4B       |
|  |  |  | ZNF317      |
|  |  |  | MRPL4       |
|  |  |  | ZNF627      |
|  |  |  | ZNF791      |
|  |  |  | RNASEH2A    |
|  |  |  | THSD8       |
|  |  |  | ZSWIM4      |
|  |  |  | ZNF333      |
|  |  |  | SYDE1       |
|  |  |  | FAM32A      |
|  |  |  | OCEL1       |
|  |  |  | PGPEP1      |
|  |  |  | KLHL26      |
|  |  |  | ARMC6       |
|  |  |  | ZNF85       |
|  |  |  | ZNF726      |
|  |  |  | ZNF254      |
|  |  |  | DPY19L3     |
|  |  |  | FAAP24      |
|  |  |  | HAUS5       |
|  |  |  | ZNF420      |
|  |  |  | SPINT2      |
|  |  |  | MRPS12      |
|  |  |  | PLD3        |
|  |  |  | RAB4B-EGLN2 |
|  |  |  | EGLN2       |
|  |  |  | AXL         |
|  |  |  | CCDC97      |
|  |  |  | ZNF574      |
|  |  |  | ZNF225      |
|  |  |  | VASP        |
|  |  |  | CALM3       |
|  |  |  | CYTH2       |
|  |  |  | PTOV1       |

|  |  |  |         |
|--|--|--|---------|
|  |  |  | ATF5    |
|  |  |  | RPL28   |
|  |  |  | ZNF264  |
|  |  |  | ZIK1    |
|  |  |  | ZNF211  |
|  |  |  | ZNF776  |
|  |  |  | ZNF587  |
|  |  |  | ZNF584  |
|  |  |  | ZNF324B |
|  |  |  | PXDN    |
|  |  |  | MBOAT2  |
|  |  |  | WDR35   |
|  |  |  | SDC1    |
|  |  |  | APOB    |
|  |  |  | OTOF    |
|  |  |  | CCDC121 |
|  |  |  | DHX57   |
|  |  |  | SOS1    |
|  |  |  | SLC8A1  |
|  |  |  | COX7A2L |
|  |  |  | PREPL   |
|  |  |  | BCL11A  |
|  |  |  | FAM161A |
|  |  |  | SPRED2  |
|  |  |  | TGFA    |
|  |  |  | TEX261  |
|  |  |  | MOB1A   |
|  |  |  | TGOLN2  |
|  |  |  | ZNF514  |
|  |  |  | STARD7  |
|  |  |  | TMEM127 |
|  |  |  | ACTR1B  |
|  |  |  | LONRF2  |
|  |  |  | CHST10  |
|  |  |  | SLC35F5 |
|  |  |  | CCDC93  |
|  |  |  | BIN1    |
|  |  |  | MAP3K2  |
|  |  |  | WDR33   |
|  |  |  | FAM168B |
|  |  |  | NCKAP5  |
|  |  |  | PRPF40A |
|  |  |  | BAZ2B   |
|  |  |  | CD302   |
|  |  |  | STK39   |
|  |  |  | WIPF1   |
|  |  |  | LNPK    |
|  |  |  | TTC30A  |
|  |  |  | STK17B  |
|  |  |  | SATB2   |
|  |  |  | KCTD18  |

|  |  |  |          |
|--|--|--|----------|
|  |  |  | ORC2     |
|  |  |  | TRAK2    |
|  |  |  | RAPH1    |
|  |  |  | INO80D   |
|  |  |  | FZD5     |
|  |  |  | IGFBP5   |
|  |  |  | WDFY1    |
|  |  |  | DOCK10   |
|  |  |  | SLC16A14 |
|  |  |  | COL6A3   |
|  |  |  | PER2     |
|  |  |  | THAP4    |
|  |  |  | SOX11    |
|  |  |  | ASAP2    |
|  |  |  | GEN1     |
|  |  |  | RAB10    |
|  |  |  | TMEM214  |
|  |  |  | SNX17    |
|  |  |  | GPN1     |
|  |  |  | BABAM2   |
|  |  |  | PPP1CB   |
|  |  |  | WDR43    |
|  |  |  | MSH6     |
|  |  |  | SPTBN1   |
|  |  |  | EHBP1    |
|  |  |  | AFTPH    |
|  |  |  | CEP68    |
|  |  |  | ANTXR1   |
|  |  |  | MXD1     |
|  |  |  | STAMPB   |
|  |  |  | MAT2A    |
|  |  |  | VAMP8    |
|  |  |  | MRPL35   |
|  |  |  | KCNIP3   |
|  |  |  | CNNM3    |
|  |  |  | INPP4A   |
|  |  |  | GCC2     |
|  |  |  | ZC3H6    |
|  |  |  | INHBB    |
|  |  |  | CCNT2    |
|  |  |  | KIF5C    |
|  |  |  | GALNT13  |
|  |  |  | TANC1    |
|  |  |  | DCAF17   |
|  |  |  | CYBRD1   |
|  |  |  | CDCA7    |
|  |  |  | PLEKHA3  |
|  |  |  | SSFA2    |
|  |  |  | FAM171B  |
|  |  |  | C2orf88  |
|  |  |  | NABP1    |

|  |  |  |                |
|--|--|--|----------------|
|  |  |  | FZD7           |
|  |  |  | BMPR2          |
|  |  |  | NRP2           |
|  |  |  | FASTKD2        |
|  |  |  | CREB1          |
|  |  |  | RPE            |
|  |  |  | RHBDD1         |
|  |  |  | AGAP1          |
|  |  |  | SCLY           |
|  |  |  | UBE2F-SCLY     |
|  |  |  | ASB1           |
|  |  |  | AL121758. 1    |
|  |  |  | SRXN1          |
|  |  |  | IDH3B          |
|  |  |  | LZTS3          |
|  |  |  | PCNA           |
|  |  |  | TRMT6          |
|  |  |  | TMX4           |
|  |  |  | APMAP          |
|  |  |  | PLAGL2         |
|  |  |  | E2F1           |
|  |  |  | PXMP4          |
|  |  |  | NDRG3          |
|  |  |  | ZHX3           |
|  |  |  | SERINC3        |
|  |  |  | TP53RK         |
|  |  |  | B4GALT5        |
|  |  |  | SPATA2         |
|  |  |  | TMEM189-UBE2V1 |
|  |  |  | UBE2V1         |
|  |  |  | NFATC2         |
|  |  |  | ZNF217         |
|  |  |  | BCAS1          |
|  |  |  | CYP24A1        |
|  |  |  | PRELID3B       |
|  |  |  | YTHDF1         |
|  |  |  | ARFRP1         |
|  |  |  | SAMD10         |
|  |  |  | STK35          |
|  |  |  | ATRN           |
|  |  |  | PYGB           |
|  |  |  | POFUT1         |
|  |  |  | ASXL1          |
|  |  |  | ITCH           |
|  |  |  | MAP1LC3A       |
|  |  |  | TP53INP2       |
|  |  |  | PHF20          |
|  |  |  | EPB41L1        |
|  |  |  | HNF4A          |
|  |  |  | TTPAL          |
|  |  |  | WISP2          |

|  |  |  |             |
|--|--|--|-------------|
|  |  |  | KCNK15      |
|  |  |  | YWHAB       |
|  |  |  | STK4        |
|  |  |  | SLC2A10     |
|  |  |  | NCOA3       |
|  |  |  | ARFGEF2     |
|  |  |  | SLC9A8      |
|  |  |  | RBM38       |
|  |  |  | RAB22A      |
|  |  |  | LSM14B      |
|  |  |  | GID8        |
|  |  |  | SLC2A4RG    |
|  |  |  | NRIP1       |
|  |  |  | N6AMT1      |
|  |  |  | SYNJ1       |
|  |  |  | TMEM50B     |
|  |  |  | RUNX1       |
|  |  |  | VPS26C      |
|  |  |  | BRWD1       |
|  |  |  | PRDM15      |
|  |  |  | C2CD2       |
|  |  |  | WDR4        |
|  |  |  | SLC19A1     |
|  |  |  | LSS         |
|  |  |  | IFNAR2      |
|  |  |  | AP000295. 1 |
|  |  |  | IFNAR1      |
|  |  |  | IFNGR2      |
|  |  |  | SLC5A3      |
|  |  |  | DYRK1A      |
|  |  |  | RRP1B       |
|  |  |  | PDXK        |
|  |  |  | PFKL        |
|  |  |  | ADARB1      |
|  |  |  | DGCR2       |
|  |  |  | CLTCL1      |
|  |  |  | ZNF280B     |
|  |  |  | ZNF70       |
|  |  |  | CHCHD10     |
|  |  |  | HPS4        |
|  |  |  | MN1         |
|  |  |  | XBP1        |
|  |  |  | ASCC2       |
|  |  |  | LIF         |
|  |  |  | OSM         |
|  |  |  | PIK3IP1     |
|  |  |  | PRR14L      |
|  |  |  | RBFOX2      |
|  |  |  | TXN2        |
|  |  |  | RAC2        |
|  |  |  | CARD10      |

|  |  |  |             |
|--|--|--|-------------|
|  |  |  | JOSD1       |
|  |  |  | CBX7        |
|  |  |  | MKL1        |
|  |  |  | TOB2        |
|  |  |  | NFAM1       |
|  |  |  | BCL2L13     |
|  |  |  | ZNF74       |
|  |  |  | SNAP29      |
|  |  |  | CRKL        |
|  |  |  | HIC2        |
|  |  |  | PPIL2       |
|  |  |  | SLC2A11     |
|  |  |  | CCDC117     |
|  |  |  | ZNRF3       |
|  |  |  | FBX07       |
|  |  |  | MCM5        |
|  |  |  | PDXP        |
|  |  |  | Z83844. 3   |
|  |  |  | Z83844. 1   |
|  |  |  | TRIOBP      |
|  |  |  | MICALL1     |
|  |  |  | APOBEC3C    |
|  |  |  | MIEF1       |
|  |  |  | ATF4        |
|  |  |  | TNRC6B      |
|  |  |  | XPNPEP3     |
|  |  |  | PPP6R2      |
|  |  |  | ADM2        |
|  |  |  | MAPK8IP2    |
|  |  |  | RAD18       |
|  |  |  | MRPS25      |
|  |  |  | TBC1D5      |
|  |  |  | SLC4A7      |
|  |  |  | AZI2        |
|  |  |  | TMPPE       |
|  |  |  | CLASP2      |
|  |  |  | EPM2AIP1    |
|  |  |  | ZNF445      |
|  |  |  | CDCP1       |
|  |  |  | FYC01       |
|  |  |  | SETD2       |
|  |  |  | SHISA5      |
|  |  |  | UQCRC1      |
|  |  |  | CELSR3      |
|  |  |  | GMPPB       |
|  |  |  | HYAL2       |
|  |  |  | TUSC2       |
|  |  |  | CISH        |
|  |  |  | AC097637. 1 |
|  |  |  | TWF2        |
|  |  |  | BAP1        |



|  |  |  |         |
|--|--|--|---------|
|  |  |  | PBRM1   |
|  |  |  | FAM208A |
|  |  |  | DENND6A |
|  |  |  | TMF1    |
|  |  |  | FOXP1   |
|  |  |  | RYBP    |
|  |  |  | CGGBP1  |
|  |  |  | ABI3BP  |
|  |  |  | CBLB    |
|  |  |  | CIP2A   |
|  |  |  | USF3    |
|  |  |  | NAA50   |
|  |  |  | GSK3B   |
|  |  |  | LRRC58  |
|  |  |  | FSTL1   |
|  |  |  | POLQ    |
|  |  |  | GOLGB1  |
|  |  |  | KPNA1   |
|  |  |  | HEG1    |
|  |  |  | SNX4    |
|  |  |  | SLC41A3 |
|  |  |  | MGLL    |
|  |  |  | H1FX    |
|  |  |  | TMCC1   |
|  |  |  | AMOTL2  |
|  |  |  | ANAPC13 |
|  |  |  | DZIP1L  |
|  |  |  | GK5     |
|  |  |  | XRN1    |
|  |  |  | PLOD2   |
|  |  |  | TM4SF1  |
|  |  |  | SSR3    |
|  |  |  | CCNL1   |
|  |  |  | IFT80   |
|  |  |  | PHC3    |
|  |  |  | EIF5A2  |
|  |  |  | PLD1    |
|  |  |  | TNFSF10 |
|  |  |  | NCEH1   |
|  |  |  | GNB4    |
|  |  |  | TMEM41A |
|  |  |  | IGF2BP2 |
|  |  |  | ETV5    |
|  |  |  | MASP1   |
|  |  |  | TFRC    |
|  |  |  | NCBP2   |
|  |  |  | BDH1    |
|  |  |  | EDEM1   |
|  |  |  | SETD5   |
|  |  |  | MTMR14  |
|  |  |  | JAGN1   |

|  |  |  |          |
|--|--|--|----------|
|  |  |  | BRK1     |
|  |  |  | VHL      |
|  |  |  | TATDN2   |
|  |  |  | TSEN2    |
|  |  |  | MKRN2    |
|  |  |  | CCDC174  |
|  |  |  | NR2C2    |
|  |  |  | BTD      |
|  |  |  | UBE2E1   |
|  |  |  | TGFBR2   |
|  |  |  | GPD1L    |
|  |  |  | FBXL2    |
|  |  |  | MYD88    |
|  |  |  | XYLB     |
|  |  |  | ACVR2B   |
|  |  |  | WDR48    |
|  |  |  | SLC25A38 |
|  |  |  | ZNF619   |
|  |  |  | ZNF197   |
|  |  |  | KLHL18   |
|  |  |  | ZNF589   |
|  |  |  | ARIH2    |
|  |  |  | PDE12    |
|  |  |  | SLMAP    |
|  |  |  | RPP14    |
|  |  |  | PTPRG    |
|  |  |  | KBTD8    |
|  |  |  | MITF     |
|  |  |  | C3orf38  |
|  |  |  | COL8A1   |
|  |  |  | ALCAM    |
|  |  |  | ABHD10   |
|  |  |  | C3orf52  |
|  |  |  | ADPRH    |
|  |  |  | NR1I2    |
|  |  |  | ATP2C1   |
|  |  |  | FOXL2NB  |
|  |  |  | U2SURP   |
|  |  |  | SEC62    |
|  |  |  | SKIL     |
|  |  |  | ATP11B   |
|  |  |  | DVL3     |
|  |  |  | SEN2     |
|  |  |  | IL1RAP   |
|  |  |  | CCDC50   |
|  |  |  | OPA1     |
|  |  |  | FBX045   |
|  |  |  | PAK2     |
|  |  |  | SEN2     |
|  |  |  | ZFYVE28  |
|  |  |  | MFSD10   |

|  |  |  |  |          |
|--|--|--|--|----------|
|  |  |  |  | AFAP1    |
|  |  |  |  | SEL1L3   |
|  |  |  |  | BEND4    |
|  |  |  |  | ATP8A1   |
|  |  |  |  | USP46    |
|  |  |  |  | PPAT     |
|  |  |  |  | UBA6     |
|  |  |  |  | RCHY1    |
|  |  |  |  | G3BP2    |
|  |  |  |  | CNOT6L   |
|  |  |  |  | ANTXR2   |
|  |  |  |  | RASGEF1B |
|  |  |  |  | WDFY3    |
|  |  |  |  | PYURF    |
|  |  |  |  | FAM13A   |
|  |  |  |  | GPRIN3   |
|  |  |  |  | TRMT10A  |
|  |  |  |  | CCNA2    |
|  |  |  |  | ANKRD50  |
|  |  |  |  | MFSD8    |
|  |  |  |  | INPP4B   |
|  |  |  |  | OTUD4    |
|  |  |  |  | SLC10A7  |
|  |  |  |  | FBXW7    |
|  |  |  |  | 1-Mar    |
|  |  |  |  | AADAT    |
|  |  |  |  | SORBS2   |
|  |  |  |  | NSD2     |
|  |  |  |  | RNF4     |
|  |  |  |  | HTT      |
|  |  |  |  | PCDH7    |
|  |  |  |  | ATP10D   |
|  |  |  |  | EREG     |
|  |  |  |  | THAP6    |
|  |  |  |  | ODAPH    |
|  |  |  |  | SEPT11   |
|  |  |  |  | PRDM8    |
|  |  |  |  | AFF1     |
|  |  |  |  | HERC6    |
|  |  |  |  | HERC3    |
|  |  |  |  | SGMS2    |
|  |  |  |  | OSTC     |
|  |  |  |  | SEC24B   |
|  |  |  |  | ANK2     |
|  |  |  |  | METTL14  |
|  |  |  |  | FGF2     |
|  |  |  |  | ABHD18   |
|  |  |  |  | LARP1B   |
|  |  |  |  | C4orf33  |
|  |  |  |  | GAB1     |
|  |  |  |  | ARFIP1   |

|  |  |  |            |
|--|--|--|------------|
|  |  |  | FGB        |
|  |  |  | CEP44      |
|  |  |  | TENM3      |
|  |  |  | SNX25      |
|  |  |  | SLC9A3     |
|  |  |  | LMBRD2     |
|  |  |  | C5orf42    |
|  |  |  | LIFR       |
|  |  |  | SLC38A9    |
|  |  |  | PDE4D      |
|  |  |  | MRPS27     |
|  |  |  | ENC1       |
|  |  |  | GFM2       |
|  |  |  | LHFPL2     |
|  |  |  | MTX3       |
|  |  |  | TMEM167A   |
|  |  |  | GLRX       |
|  |  |  | EPB41L4A   |
|  |  |  | REEP5      |
|  |  |  | TMED7      |
|  |  |  | DTWD2      |
|  |  |  | LOX        |
|  |  |  | RAPGEF6    |
|  |  |  | AC008695.1 |
|  |  |  | IRF1       |
|  |  |  | KIF3A      |
|  |  |  | AFF4       |
|  |  |  | HNRNPA0    |
|  |  |  | NDUFA2     |
|  |  |  | SPRY4      |
|  |  |  | TNIP1      |
|  |  |  | ADAM19     |
|  |  |  | PANK3      |
|  |  |  | FBXW11     |
|  |  |  | UBTD2      |
|  |  |  | STC2       |
|  |  |  | MXD3       |
|  |  |  | SRD5A1     |
|  |  |  | FAM105A    |
|  |  |  | OTULIN     |
|  |  |  | NPR3       |
|  |  |  | C5orf51    |
|  |  |  | GHR        |
|  |  |  | ISL1       |
|  |  |  | ITGA2      |
|  |  |  | MTREX      |
|  |  |  | MAP1B      |
|  |  |  | TNP01      |
|  |  |  | FCH02      |
|  |  |  | F2R        |
|  |  |  | AGGF1      |

|  |  |  |                 |
|--|--|--|-----------------|
|  |  |  | SCAMP1          |
|  |  |  | ARSK            |
|  |  |  | RGMB            |
|  |  |  | WDR36           |
|  |  |  | DCP2            |
|  |  |  | AP3S1           |
|  |  |  | CSNK1G3         |
|  |  |  | PDLIM4          |
|  |  |  | SLC22A5         |
|  |  |  | UBE2B           |
|  |  |  | SEC24A          |
|  |  |  | CAMLG           |
|  |  |  | DDX46           |
|  |  |  | C5orf24         |
|  |  |  | FAM53C          |
|  |  |  | EGR1            |
|  |  |  | UBE2D2          |
|  |  |  | CYSTM1          |
|  |  |  | EIF4EBP3        |
|  |  |  | ANKHD1-EIF4EBP3 |
|  |  |  | HARS2           |
|  |  |  | ZMAT2           |
|  |  |  | PCDHA6          |
|  |  |  | PCDHA9          |
|  |  |  | PCDHA8          |
|  |  |  | PCDHA7          |
|  |  |  | PCDHA5          |
|  |  |  | PCDHA4          |
|  |  |  | PCDHA2          |
|  |  |  | PCDHA1          |
|  |  |  | PCDHA13         |
|  |  |  | PCDHAC2         |
|  |  |  | PCDHAC1         |
|  |  |  | PCDHA11         |
|  |  |  | PCDHA10         |
|  |  |  | PCDHA12         |
|  |  |  | PCDHA3          |
|  |  |  | GRPEL2          |
|  |  |  | SLC26A2         |
|  |  |  | TCOF1           |
|  |  |  | NDST1           |
|  |  |  | GALNT10         |
|  |  |  | LARP1           |
|  |  |  | ITK             |
|  |  |  | CYFIP2          |
|  |  |  | HMMR            |
|  |  |  | WWC1            |
|  |  |  | CREBRF          |
|  |  |  | ARL10           |
|  |  |  | FAF2            |
|  |  |  | N4BP3           |

|  |  |  |                |  |
|--|--|--|----------------|--|
|  |  |  | SERPINB9       |  |
|  |  |  | TUBB2A         |  |
|  |  |  | F13A1          |  |
|  |  |  | SSR1           |  |
|  |  |  | TXNDC5         |  |
|  |  |  | BLOC1S5-TXNDC5 |  |
|  |  |  | ATXN1          |  |
|  |  |  | KIF13A         |  |
|  |  |  | ZKSCAN4        |  |
|  |  |  | CDSN           |  |
|  |  |  | ATF6B          |  |
|  |  |  | LEMD2          |  |
|  |  |  | FKBP5          |  |
|  |  |  | SRPK1          |  |
|  |  |  | CCND3          |  |
|  |  |  | ZNF318         |  |
|  |  |  | AARS2          |  |
|  |  |  | MCM3           |  |
|  |  |  | ICK            |  |
|  |  |  | GCLC           |  |
|  |  |  | LMBRD1         |  |
|  |  |  | SLC17A5        |  |
|  |  |  | PHIP           |  |
|  |  |  | FAM46A         |  |
|  |  |  | PGM3           |  |
|  |  |  | SYNCRIP        |  |
|  |  |  | LYRM2          |  |
|  |  |  | BACH2          |  |
|  |  |  | BVES           |  |
|  |  |  | PREP           |  |
|  |  |  | ATG5           |  |
|  |  |  | SEC63          |  |
|  |  |  | OSTM1          |  |
|  |  |  | ZBTB24         |  |
|  |  |  | REV3L          |  |
|  |  |  | TSPYL1         |  |
|  |  |  | GOPC           |  |
|  |  |  | MAN1A1         |  |
|  |  |  | SERINC1        |  |
|  |  |  | ARHGAP18       |  |
|  |  |  | LRP11          |  |
|  |  |  | SERAC1         |  |
|  |  |  | DYNLT1         |  |
|  |  |  | EZR            |  |
|  |  |  | AGPAT4         |  |
|  |  |  | RPS6KA2        |  |
|  |  |  | BPHL           |  |
|  |  |  | GCNT2          |  |
|  |  |  | E2F3           |  |
|  |  |  | ALDH5A1        |  |
|  |  |  | BTN3A2         |  |

|  |  |  |  |            |
|--|--|--|--|------------|
|  |  |  |  | BTN3A1     |
|  |  |  |  | ZSCAN26    |
|  |  |  |  | ATAT1      |
|  |  |  |  | C6orf136   |
|  |  |  |  | TUBB       |
|  |  |  |  | DDR1       |
|  |  |  |  | HLA-DRA    |
|  |  |  |  | UHRF1BP1   |
|  |  |  |  | ANKS1A     |
|  |  |  |  | KCTD20     |
|  |  |  |  | SRSF3      |
|  |  |  |  | CDKN1A     |
|  |  |  |  | FOXP4      |
|  |  |  |  | AL365205.1 |
|  |  |  |  | TOMM6      |
|  |  |  |  | PPP2R5D    |
|  |  |  |  | KLC4       |
|  |  |  |  | PTK7       |
|  |  |  |  | TJAP1      |
|  |  |  |  | POLH       |
|  |  |  |  | RUNX2      |
|  |  |  |  | EFHC1      |
|  |  |  |  | TMEM14A    |
|  |  |  |  | FBX09      |
|  |  |  |  | PHF3       |
|  |  |  |  | SMAP1      |
|  |  |  |  | SH3BGRL2   |
|  |  |  |  | PNRC1      |
|  |  |  |  | PM20D2     |
|  |  |  |  | UFL1       |
|  |  |  |  | LIN28B     |
|  |  |  |  | PRDM1      |
|  |  |  |  | SOBP       |
|  |  |  |  | FOXO3      |
|  |  |  |  | CEP57L1    |
|  |  |  |  | CDC40      |
|  |  |  |  | AMD1       |
|  |  |  |  | RNF217     |
|  |  |  |  | VTA1       |
|  |  |  |  | ADGRG6     |
|  |  |  |  | UTRN       |
|  |  |  |  | TAB2       |
|  |  |  |  | CCDC170    |
|  |  |  |  | ARID1B     |
|  |  |  |  | TULP4      |
|  |  |  |  | AFDN       |
|  |  |  |  | FAM120B    |
|  |  |  |  | TBP        |
|  |  |  |  | EIF2AK1    |
|  |  |  |  | CYTH3      |
|  |  |  |  | NDUFA4     |

|  |  |  |  |          |
|--|--|--|--|----------|
|  |  |  |  | AGR2     |
|  |  |  |  | MACC1    |
|  |  |  |  | CYCS     |
|  |  |  |  | HOXA10   |
|  |  |  |  | HOXA11   |
|  |  |  |  | JAZF1    |
|  |  |  |  | NOD1     |
|  |  |  |  | DPY19L1  |
|  |  |  |  | KIAA0895 |
|  |  |  |  | ELMO1    |
|  |  |  |  | VPS41    |
|  |  |  |  | NUDCD3   |
|  |  |  |  | PURB     |
|  |  |  |  | TNS3     |
|  |  |  |  | GRB10    |
|  |  |  |  | SBDS     |
|  |  |  |  | BAZ1B    |
|  |  |  |  | BCL7B    |
|  |  |  |  | POM121C  |
|  |  |  |  | HIP1     |
|  |  |  |  | CACNA2D1 |
|  |  |  |  | CDK6     |
|  |  |  |  | SAMD9L   |
|  |  |  |  | PON1     |
|  |  |  |  | EPHB4    |
|  |  |  |  | NAPEPLD  |
|  |  |  |  | WASL     |
|  |  |  |  | PODXL    |
|  |  |  |  | CHCHD3   |
|  |  |  |  | CNOT4    |
|  |  |  |  | MTPN     |
|  |  |  |  | CREB3L2  |
|  |  |  |  | ZC3HAV1  |
|  |  |  |  | SLC37A3  |
|  |  |  |  | ZNF746   |
|  |  |  |  | KMT2C    |
|  |  |  |  | LMBR1    |
|  |  |  |  | ESYT2    |
|  |  |  |  | CHST12   |
|  |  |  |  | RAC1     |
|  |  |  |  | TMEM106B |
|  |  |  |  | ITGB8    |
|  |  |  |  | SP4      |
|  |  |  |  | CREB5    |
|  |  |  |  | UBE2D4   |
|  |  |  |  | PPIA     |
|  |  |  |  | CCM2     |
|  |  |  |  | IKZF1    |
|  |  |  |  | VKORC1L1 |
|  |  |  |  | KCTD7    |
|  |  |  |  | POM121   |



|  |  |  |            |
|--|--|--|------------|
|  |  |  | ELN        |
|  |  |  | CLIP2      |
|  |  |  | GTF2IRD1   |
|  |  |  | RHBDD2     |
|  |  |  | MDH2       |
|  |  |  | PHTF2      |
|  |  |  | CROT       |
|  |  |  | STEAP2     |
|  |  |  | CDK14      |
|  |  |  | ANKIB1     |
|  |  |  | PEG10      |
|  |  |  | ZNF655     |
|  |  |  | ZKSCAN1    |
|  |  |  | COPS6      |
|  |  |  | AGFG2      |
|  |  |  | CUX1       |
|  |  |  | LRRC17     |
|  |  |  | HBP1       |
|  |  |  | BCAP29     |
|  |  |  | DLD        |
|  |  |  | FOXP2      |
|  |  |  | MDFIC      |
|  |  |  | ING3       |
|  |  |  | SND1       |
|  |  |  | AHCYL2     |
|  |  |  | KLHDC10    |
|  |  |  | EXOC4      |
|  |  |  | CALD1      |
|  |  |  | TMEM140    |
|  |  |  | TRIM24     |
|  |  |  | UBN2       |
|  |  |  | LUC7L2     |
|  |  |  | CASP2      |
|  |  |  | ARHGEF5    |
|  |  |  | ZNF398     |
|  |  |  | NOM1       |
|  |  |  | DNAJB6     |
|  |  |  | SOX7       |
|  |  |  | AC105001.2 |
|  |  |  | FAM167A    |
|  |  |  | LONRF1     |
|  |  |  | DLC1       |
|  |  |  | MTUS1      |
|  |  |  | ASAHI      |
|  |  |  | PSD3       |
|  |  |  | NUDT18     |
|  |  |  | EGR3       |
|  |  |  | STC1       |
|  |  |  | NEFL       |
|  |  |  | PNMA2      |
|  |  |  | SARAF      |

|  |  |  |          |
|--|--|--|----------|
|  |  |  | RNF122   |
|  |  |  | BRF2     |
|  |  |  | NSD3     |
|  |  |  | KAT6A    |
|  |  |  | THAP1    |
|  |  |  | PCMTD1   |
|  |  |  | TCEA1    |
|  |  |  | PLAG1    |
|  |  |  | IMPAD1   |
|  |  |  | SLC05A1  |
|  |  |  | TPD52    |
|  |  |  | ZNF704   |
|  |  |  | ZFAND1   |
|  |  |  | MMP16    |
|  |  |  | RBM12B   |
|  |  |  | TP53INP1 |
|  |  |  | YWHAZ    |
|  |  |  | TAF2     |
|  |  |  | DSCC1    |
|  |  |  | HAS2     |
|  |  |  | ZHX1     |
|  |  |  | ASAP1    |
|  |  |  | PTK2     |
|  |  |  | JRK      |
|  |  |  | PLEC     |
|  |  |  | SHARPIN  |
|  |  |  | ZNF596   |
|  |  |  | CLN8     |
|  |  |  | XP07     |
|  |  |  | SORBS3   |
|  |  |  | C8orf58  |
|  |  |  | CCAR2    |
|  |  |  | RHOBTB2  |
|  |  |  | PPP2R2A  |
|  |  |  | RBPM5    |
|  |  |  | ERLIN2   |
|  |  |  | DDHD2    |
|  |  |  | TACC1    |
|  |  |  | GOLGA7   |
|  |  |  | GINS4    |
|  |  |  | BHLHE22  |
|  |  |  | SGK3     |
|  |  |  | PI15     |
|  |  |  | ZC2HC1A  |
|  |  |  | E2F5     |
|  |  |  | TMEM67   |
|  |  |  | ESRP1    |
|  |  |  | SDC2     |
|  |  |  | VPS13B   |
|  |  |  | EBAG9    |
|  |  |  | MAL2     |

|  |  |  |             |
|--|--|--|-------------|
|  |  |  | FAM91A1     |
|  |  |  | ZNF572      |
|  |  |  | CHRAC1      |
|  |  |  | THEM6       |
|  |  |  | HSF1        |
|  |  |  | ERMP1       |
|  |  |  | GLDC        |
|  |  |  | PTPRD       |
|  |  |  | NFIB        |
|  |  |  | BAG1        |
|  |  |  | AQP3        |
|  |  |  | NOL6        |
|  |  |  | DCAF12      |
|  |  |  | MYORG       |
|  |  |  | FAM219A     |
|  |  |  | RPP25L      |
|  |  |  | RNF38       |
|  |  |  | PTAR1       |
|  |  |  | TMEM2       |
|  |  |  | TLE1        |
|  |  |  | SPTLC1      |
|  |  |  | FBP1        |
|  |  |  | PTCH1       |
|  |  |  | ZNF367      |
|  |  |  | ZNF782      |
|  |  |  | TSTD2       |
|  |  |  | TBC1D2      |
|  |  |  | ABCA1       |
|  |  |  | SUSD1       |
|  |  |  | FKBP15      |
|  |  |  | MEGF9       |
|  |  |  | FBXW2       |
|  |  |  | ZBTB6       |
|  |  |  | DENND1A     |
|  |  |  | GOLGA1      |
|  |  |  | PPP6C       |
|  |  |  | FAM129B     |
|  |  |  | PTRH1       |
|  |  |  | TOR2A       |
|  |  |  | AK1         |
|  |  |  | ST6GALNAC6  |
|  |  |  | AL157935. 2 |
|  |  |  | ZER1        |
|  |  |  | SPOUT1      |
|  |  |  | UCK1        |
|  |  |  | ENTPD2      |
|  |  |  | KANK1       |
|  |  |  | UNC13B      |
|  |  |  | GLIPR2      |
|  |  |  | POLR1E      |
|  |  |  | GCNT1       |

|  |  |  |  |         |
|--|--|--|--|---------|
|  |  |  |  | PSAT1   |
|  |  |  |  | CTSL    |
|  |  |  |  | PHF2    |
|  |  |  |  | NCBP1   |
|  |  |  |  | NR4A3   |
|  |  |  |  | STX17   |
|  |  |  |  | RNF20   |
|  |  |  |  | RAD23B  |
|  |  |  |  | HSDL2   |
|  |  |  |  | SNX30   |
|  |  |  |  | SLC31A1 |
|  |  |  |  | RGS3    |
|  |  |  |  | ZNF618  |
|  |  |  |  | COL27A1 |
|  |  |  |  | PAPPA   |
|  |  |  |  | MRRF    |
|  |  |  |  | ZBTB34  |
|  |  |  |  | RALGPS1 |
|  |  |  |  | SLC2A8  |
|  |  |  |  | DNM1    |
|  |  |  |  | ABL1    |
|  |  |  |  | PRRC2B  |
|  |  |  |  | TMEM141 |
|  |  |  |  | EHMT1   |
|  |  |  |  | PRKX    |
|  |  |  |  | ANOS1   |
|  |  |  |  | MID1    |
|  |  |  |  | GPM6B   |
|  |  |  |  | PIGA    |
|  |  |  |  | CTPS2   |
|  |  |  |  | EIF1AX  |
|  |  |  |  | RPS6KA3 |
|  |  |  |  | TAB3    |
|  |  |  |  | SLC35A2 |
|  |  |  |  | FAM156A |
|  |  |  |  | KDM5C   |
|  |  |  |  | SMC1A   |
|  |  |  |  | PHF8    |
|  |  |  |  | AMER1   |
|  |  |  |  | EDA2R   |
|  |  |  |  | SNX12   |
|  |  |  |  | ZMYM3   |
|  |  |  |  | PCDH19  |
|  |  |  |  | TSPAN6  |
|  |  |  |  | TSC22D3 |
|  |  |  |  | ACSL4   |
|  |  |  |  | AMOT    |
|  |  |  |  | LAMP2   |
|  |  |  |  | ZNF280C |
|  |  |  |  | RTL8B   |
|  |  |  |  | MAP7D3  |

|  |  |  |         |
|--|--|--|---------|
|  |  |  | ARHGEF6 |
|  |  |  | MECP2   |
|  |  |  | WWC3    |
|  |  |  | HCCS    |
|  |  |  | PRPS2   |
|  |  |  | MOSPD2  |
|  |  |  | CA5B    |
|  |  |  | REPS2   |
|  |  |  | TSPAN7  |
|  |  |  | USP9X   |
|  |  |  | ZNF81   |
|  |  |  | FAM156B |
|  |  |  | TSPYL2  |
|  |  |  | TSR2    |
|  |  |  | ZXDB    |
|  |  |  | MSN     |
|  |  |  | AR      |
|  |  |  | IGBP1   |
|  |  |  | SLC16A2 |
|  |  |  | UPRT    |
|  |  |  | PGK1    |
|  |  |  | APOOL   |
|  |  |  | FAM133A |
|  |  |  | RPL36A  |
|  |  |  | ARMCX1  |
|  |  |  | NXT2    |
|  |  |  | SLC6A14 |
|  |  |  | DOCK11  |
|  |  |  | PGRMC1  |
|  |  |  | UBE2A   |
|  |  |  | ZBTB33  |
|  |  |  | XIAP    |
|  |  |  | OCRL    |
|  |  |  | SLC9A6  |
|  |  |  | HMGB3   |
|  |  |  | VMA21   |
|  |  |  | ZNF275  |
|  |  |  | ABCD1   |
|  |  |  | GDI1    |
|  |  |  | FUNDC2  |
