# Supplementary material for: MicroRNA-877-5p Inhibits Cell Progression by Targeting FOXM1 in Lung Cancer
Source: Hindawi journal article supplement (doi:10.1155/2022/4256172), 2022-06-15
Supplement: f1 [file 4256172.f1.zip]

| <ahsa-mir-877">L UAD |  | TCGA-44-2655-11A-01R-1757-13 | TCGA-44-2657-11A-01R-1757-13 | TCGA-44-2661-11A-01R-1757-13 | TCGA-44-2665-11A-01R-1757-13 | TCGA-44-2668-11A-01R-1757-13 | TCGA-44-3396-11A-01R-1757-13 | TCGA-44-3398-11B-01R-1757-13 |
|----------------------|--|------------------------------|------------------------------|------------------------------|------------------------------|------------------------------|------------------------------|------------------------------|
| hsa-mir-8            |  | 42.47                        | 65.08                        | 45.57                        | 25.1                         | 80.56                        | 25.04                        | 18.59                        |

|                              |                              |                              |                              |                              |                              |                              |                              |                              |
|------------------------------|------------------------------|------------------------------|------------------------------|------------------------------|------------------------------|------------------------------|------------------------------|------------------------------|
|                              |                              |                              |                              |                              |                              |                              |                              |                              |
| TCGA-44-6144-11A-01H-2169-13 | TCGA-44-6776-11A-01H-2169-13 | TCGA-44-6777-11A-01H-2169-13 | TCGA-44-6778-11A-01H-2169-13 | TCGA-44-7659-11A-01H-2065-13 | TCGA-44-7660-11A-01H-2065-13 | TCGA-44-7661-11A-01H-2065-13 | TCGA-44-7662-11A-01H-2065-13 | TCGA-44-7667-11A-01H-2065-13 |
| 1.04                         | 1.3                          | 1.14                         | 0.63                         | 0.77                         | 1.12                         | 0.48                         | 0.76                         | 0.4                          |

| Normal                       |                              |                              |                              |                              |                              |                              |                              |                              |
|------------------------------|------------------------------|------------------------------|------------------------------|------------------------------|------------------------------|------------------------------|------------------------------|------------------------------|
| TCGA-44-7669-11A-01H-2065-13 | TCGA-44-7670-11A-01H-2065-13 | TCGA-44-7671-11A-01H-2065-13 | TCGA-44-7672-11A-01H-2065-13 | TCGA-49-6742-11A-01H-2169-13 | TCGA-49-6743-11A-01H-2169-13 | TCGA-49-6744-11A-01H-2169-13 | TCGA-49-6745-11A-01H-2169-13 | TCGA-50-5930-11A-01H-2169-13 |
| 0.83                         | 0.63                         | 0.68                         | 1.14                         | 1.6                          | 0.89                         | 0.48                         | 1                            | 0.38                         |

| TCGA-50-5932-11A-01H-2169-13 | TCGA-50-5933-11A-01H-2169-13 | TCGA-50-7109-11A-01H-2038-13 | TCGA-55-7283-11A-01H-2038-13 | TCGA-55-7570-11A-01H-2038-13 | TCGA-55-7574-11A-01H-2038-13 | TCGA-55-7576-11A-01H-2065-13 | TCGA-55-7724-11A-01H-2169-13 | TCGA-55-7725-11A-01H-2169-13 |
|------------------------------|------------------------------|------------------------------|------------------------------|------------------------------|------------------------------|------------------------------|------------------------------|------------------------------|
| 1.02                         | 0.7                          | 1.23                         | 0.73                         | 1.79                         | 1.99                         | 0.67                         | 0.66                         | 0.91                         |

| TCGA-55-7726-11A-01H-2169-13 | TCGA-55-7903-11A-01H-2169-13 | TCGA-55-7910-11A-01H-2169-13 | TCGA-55-7911-11A-01H-2169-13 | TCGA-55-7914-11A-01H-2169-13 | TCGA-78-7163-11A-01H-2065-13 | TCGA-78-7540-11A-01H-2065-13 | TCGA-86-7711-11A-01H-2065-13 | TCGA-86-7713-11A-01H-2065-13 |
|------------------------------|------------------------------|------------------------------|------------------------------|------------------------------|------------------------------|------------------------------|------------------------------|------------------------------|
| 0.41                         | 2.58                         | 1.26                         | 2.04                         | 0.29                         | 1.21                         | 0.5                          | 1.6                          | 0.8                          |

| TCGA-91-6835-11A-01H-2169-13 | TCGA-91-6836-11A-01H-2169-13 | TCGA-93-7348-11A-01H-2038-13 |  | TCGA-05-4384-01A-01T-1754-13 | TCGA-05-4390-01A-02T-1754-13 | TCGA-05-4396-01A-21H-1857-13 | TCGA-05-4405-01A-21H-1857-13 | TCGA-05-4410-01A-21H-1857-13 |
|------------------------------|------------------------------|------------------------------|--|------------------------------|------------------------------|------------------------------|------------------------------|------------------------------|
| 1.68                         | 1.32                         | 1.06                         |  | 2.14                         | 5.08                         | 3.76                         | 1.53                         | 1.31                         |

| TCGA-05-4415-01A-22H-1857-13 | TCGA-05-4417-01A-22H-1857-13 | TCGA-05-4424-01A-22H-1857-13 | TCGA-05-4425-01A-01T-1754-13 | TCGA-05-4427-01A-21H-1857-13 | TCGA-05-4433-01A-22H-1857-13 | TCGA-05-5420-01A-01T-1627-13 | TCGA-05-5423-01A-01T-1627-13 | TCGA-05-5425-01A-02T-1627-13 |
|------------------------------|------------------------------|------------------------------|------------------------------|------------------------------|------------------------------|------------------------------|------------------------------|------------------------------|
| 8.13                         | 4.11                         | 11.19                        | 2.77                         | 0.3                          | 2.81                         | 0.84                         | 0.98                         | 1.17                         |

| TCGA-05-5428-01A-01T-1627-13 | TCGA-05-5429-01A-01T-1627-13 | TCGA-05-5715-01A-01T-1627-13 | TCGA-35-5375-01A-01T-1627-13 | TCGA-38-4631-01A-01T-1754-13 | TCGA-38-4632-01A-01T-1754-13 | TCGA-38-6178-01A-11H-1754-13 | TCGA-38-7271-01A-11H-2038-13 | TCGA-38-A44F-01A-11H-A24G-13 |
|------------------------------|------------------------------|------------------------------|------------------------------|------------------------------|------------------------------|------------------------------|------------------------------|------------------------------|
| 1.06                         | 0.56                         | 5.12                         | 1.84                         | 26.6                         | 4.06                         | 4.76                         | 1.4                          | 0.32                         |



| TCGA-44-5643-01A-01T-1627-13 | TCGA-44-5644-01A-21H-2038-13 | TCGA-44-5645-01A-01T-1627-13 | TCGA-44-6144-01A-11H-1754-13 | TCGA-44-6145-01A-11H-1754-13 | TCGA-44-6146-01A-11H-1754-13 | TCGA-44-6146-01A-11H-A279-13 | TCGA-44-6146-01B-04R-A27D-13 | TCGA-44-6147-01A-11H-1754-13 |
|------------------------------|------------------------------|------------------------------|------------------------------|------------------------------|------------------------------|------------------------------|------------------------------|------------------------------|
| 3.64                         | 11.44                        | 1.05                         | 10.03                        | 2.71                         | 8.87                         | 4.16                         | 6.74                         | 4.74                         |

| TCGA-44-6147-01A-11H-A279-13 | TCGA-44-6147-01B-06R-A27D-13 | TCGA-44-6148-01A-11H-1754-13 | TCGA-44-6774-01A-21H-1857-13 | TCGA-44-6775-01A-11H-1857-13 | TCGA-44-6775-01A-11H-A279-13 | TCGA-44-6775-01C-02R-A27D-13 | TCGA-44-6776-01A-11H-1857-13 | TCGA-44-6777-01A-11H-1857-13 |
|------------------------------|------------------------------|------------------------------|------------------------------|------------------------------|------------------------------|------------------------------|------------------------------|------------------------------|
| 5.95                         | 9.89                         | 1.45                         | 2.3                          | 2                            | 1.8                          | 14.04                        | 1.08                         | 0.1                          |

|                              |                              |                              |                              |                              |                              |                              |                              |                              |
|------------------------------|------------------------------|------------------------------|------------------------------|------------------------------|------------------------------|------------------------------|------------------------------|------------------------------|
|                              |                              |                              |                              |                              |                              |                              |                              |                              |
| TCGA-44-6778-01A-11H-1857-13 | TCGA-44-6779-01A-11H-1857-13 | TCGA-44-7659-01A-11H-2065-13 | TCGA-44-7660-01A-11H-2065-13 | TCGA-44-7661-01A-11H-2065-13 | TCGA-44-7662-01A-11H-2065-13 | TCGA-44-7667-01A-31H-2065-13 | TCGA-44-7669-01A-21H-2065-13 | TCGA-44-7670-01A-11H-2065-13 |
| 0.93                         | 0.1                          | 1.02                         | 5.84                         | 3.5                          | 2.36                         | 8.11                         | 7.91                         | 8.47                         |

| TCGA-44-7671-01A-11H-2065-13 | TCGA-44-7672-01A-11H-2065-13 | TCGA-44-8117-01A-11H-2240-13 | TCGA-44-8119-01A-11H-2240-13 | TCGA-44-8120-01A-11H-2240-13 | TCGA-44-A479-01A-31H-A24G-13 | TCGA-44-A47A-01A-21H-A24G-13 | TCGA-44-A47B-01A-11H-A24G-13 | TCGA-44-A47F-01A-11H-A24G-13 |
|------------------------------|------------------------------|------------------------------|------------------------------|------------------------------|------------------------------|------------------------------|------------------------------|------------------------------|
| 2.25                         | 1.85                         | 2.6                          | 3.32                         | 4.97                         | 1.56                         | 1.29                         | 1.41                         | 1.9                          |

| TCGA-44-A47G-01A-21H-A24G-13 | TCGA-44-A4SS-01A-11H-A24S-13 | TCGA-44-A4SU-01A-11H-A24S-13 | TCGA-49-4487-01A-21H-1857-13 | TCGA-49-4488-01A-01T-1754-13 | TCGA-49-4490-01A-21H-1857-13 | TCGA-49-4512-01A-21H-1857-13 | TCGA-49-4514-01A-21H-1857-13 | TCGA-49-6742-01A-11H-1857-13 |
|------------------------------|------------------------------|------------------------------|------------------------------|------------------------------|------------------------------|------------------------------|------------------------------|------------------------------|
| 2.12                         | 1.81                         | 6.44                         | 2.05                         | 8.42                         | 2.58                         | 5.68                         | 8.54                         | 1.31                         |

| TCGA-49-6743-01A-11H-1857-13 | TCGA-49-6744-01A-11H-1857-13 | TCGA-49-6745-01A-11H-1857-13 | TCGA-49-6761-01A-31H-1948-13 | TCGA-49-6767-01A-11H-1857-13 | TCGA-49-AAQV-01A-11H-A39B-13 | TCGA-49-AAR0-01A-21H-A39B-13 | TCGA-49-AAR2-01A-11H-A39B-13 | TCGA-49-AAR3-01A-11H-A41D-13 |
|------------------------------|------------------------------|------------------------------|------------------------------|------------------------------|------------------------------|------------------------------|------------------------------|------------------------------|
| 2.47                         | 1.13                         | 0.62                         | 2.44                         | 3.84                         | 2.31                         | 3.15                         | 10.02                        | 2.11                         |

| TCGA-49-AAR4-01A-12H-A41D-13 | TCGA-49-AAR9-01A-21H-A41D-13 | TCGA-49-AARE-01A-11H-A41D-13 | TCGA-49-AARN-01A-21H-A41D-13 | TCGA-49-AARO-01A-12H-A41D-13 | TCGA-49-AARQ-01A-11H-A41D-13 | TCGA-49-AARR-01A-11H-A41D-13 | TCGA-4B-A93V-01A-11H-A39B-13 | TCGA-50-5044-01A-21H-1857-13 |
|------------------------------|------------------------------|------------------------------|------------------------------|------------------------------|------------------------------|------------------------------|------------------------------|------------------------------|
| 1.99                         | 2.6                          | 2.33                         | 1.63                         | 1.18                         | 4.45                         | 2.44                         | 5.69                         | 1.4                          |

| TCGA-50-5045-01A-01T-1627-13 | TCGA-50-5049-01A-01T-1627-13 | TCGA-50-5051-01A-21H-1857-13 | TCGA-50-5055-01A-01T-1627-13 | TCGA-50-5066-01A-01T-1627-13 | TCGA-50-5066-02A-11H-2089-13 | TCGA-50-5068-01A-01T-1627-13 | TCGA-50-5072-01A-21H-1857-13 | TCGA-50-5930-01A-11H-1754-13 |
|------------------------------|------------------------------|------------------------------|------------------------------|------------------------------|------------------------------|------------------------------|------------------------------|------------------------------|
| 0.66                         | 1.39                         | 1.87                         | 1.88                         | 1.41                         | 2.65                         | 0.74                         | 3.13                         | 3.17                         |



| TCGA-50-5931-01A-11H-1754-13 | TCGA-50-5932-01A-11H-1754-13 | TCGA-50-5933-01A-11H-1754-13 | TCGA-50-5935-01A-11H-1754-13 | TCGA-50-5936-01A-11H-1627-13 | TCGA-50-5939-01A-11H-1627-13 | TCGA-50-5941-01A-11H-1754-13 | TCGA-50-5942-01A-21H-1754-13 | TCGA-50-5944-01A-11H-1754-13 |
|------------------------------|------------------------------|------------------------------|------------------------------|------------------------------|------------------------------|------------------------------|------------------------------|------------------------------|
| 8.44                         | 3.77                         | 0.94                         | 2.79                         | 2.03                         | 2.77                         | 4.68                         | 2.59                         | 2.24                         |

| TCGA-50-5946-01A-11H-1754-13 | TCGA-50-5946-02A-11H-2089-13 | TCGA-50-6590-01A-12H-1857-13 | TCGA-50-6591-01A-11H-1754-13 | TCGA-50-6592-01A-11H-1754-13 | TCGA-50-6593-01A-11H-1754-13 | TCGA-50-6594-01A-11H-1754-13 | TCGA-50-6595-01A-12H-1857-13 | TCGA-50-6597-01A-11H-1857-13 |
|------------------------------|------------------------------|------------------------------|------------------------------|------------------------------|------------------------------|------------------------------|------------------------------|------------------------------|
| 5.56                         | 11.94                        | 2.75                         | 42.82                        | 1.93                         | 2.98                         | 1.39                         | 2.45                         | 2.36                         |

| TCGA-50-6673-01A-11H-1948-13 | TCGA-50-7109-01A-11H-2038-13 | TCGA-50-8457-01A-11H-2325-13 | TCGA-50-8459-01A-11H-2325-13 | TCGA-50-8460-01A-11H-2325-13 | TCGA-53-7624-01A-11H-2065-13 | TCGA-53-7626-01A-12H-2065-13 | TCGA-53-7813-01A-11H-2169-13 | TCGA-53-A4EZ-01A-12H-A24S-13 |
|------------------------------|------------------------------|------------------------------|------------------------------|------------------------------|------------------------------|------------------------------|------------------------------|------------------------------|
| 7.02                         | 2.56                         | 0.97                         | 0.51                         | 2.08                         | 5.36                         | 2.17                         | 3.66                         | 6.89                         |

| TCGA-55-5899-01A-11H-1627-13 | TCGA-55-6543-01A-11H-1754-13 | TCGA-55-6642-01A-11H-1857-13 | TCGA-55-6712-01A-11H-1857-13 | TCGA-55-6968-01A-11H-1948-13 | TCGA-55-6969-01A-11H-1948-13 | TCGA-55-6970-01A-11H-1948-13 | TCGA-55-6971-01A-11H-1948-13 | TCGA-55-6972-01A-11H-1948-13 |
|------------------------------|------------------------------|------------------------------|------------------------------|------------------------------|------------------------------|------------------------------|------------------------------|------------------------------|
| 7.29                         | 3.36                         | 0.81                         | 0.85                         | 3.68                         | 9.5                          | 3.23                         | 1.54                         | 8.07                         |

| TCGA-55-6978-01A-11H-1948-13 | TCGA-55-6979-01A-11H-1948-13 | TCGA-55-6980-01A-11H-1948-13 | TCGA-55-6981-01A-11H-1948-13 | TCGA-55-6982-01A-11H-1948-13 | TCGA-55-6983-01A-11H-1948-13 | TCGA-55-6984-01A-11H-1948-13 | TCGA-55-6985-01A-11H-1948-13 | TCGA-55-6986-01A-11H-1948-13 |
|------------------------------|------------------------------|------------------------------|------------------------------|------------------------------|------------------------------|------------------------------|------------------------------|------------------------------|
| 3                            | 2.76                         | 2.57                         | 7.08                         | 4.02                         | 2.41                         | 1.98                         | 5.23                         | 4.69                         |

| TCGA-55-6987-01A-11H-1948-13 | TCGA-55-7227-01A-11H-2038-13 | TCGA-55-7281-01A-11H-2038-13 | TCGA-55-7283-01A-11H-2038-13 | TCGA-55-7284-01B-11H-2240-13 | TCGA-55-7570-01A-11H-2038-13 | TCGA-55-7573-01A-11H-2038-13 | TCGA-55-7574-01A-11H-2038-13 | TCGA-55-7576-01A-11H-2065-13 |
|------------------------------|------------------------------|------------------------------|------------------------------|------------------------------|------------------------------|------------------------------|------------------------------|------------------------------|
| 2.52                         | 3.06                         | 0.88                         | 3.54                         | 1.84                         | 10.88                        | 6.38                         | 2.27                         | 0.87                         |

|                              |                              |                              |                              |                              |                              |                              |                              |                              |
|------------------------------|------------------------------|------------------------------|------------------------------|------------------------------|------------------------------|------------------------------|------------------------------|------------------------------|
|                              |                              |                              |                              |                              |                              |                              |                              |                              |
| TCGA-55-7724-01A-11H-2169-13 | TCGA-55-7725-01A-11H-2169-13 | TCGA-55-7726-01A-11H-2169-13 | TCGA-55-7727-01A-11H-2169-13 | TCGA-55-7728-01A-11H-2186-13 | TCGA-55-7815-01A-11H-2169-13 | TCGA-55-7816-01A-11H-2169-13 | TCGA-55-7903-01A-11H-2169-13 | TCGA-55-7907-01A-11H-2169-13 |
| 1.97                         | 2.2                          | 1.6                          | 6.05                         | 1.13                         | 2.8                          | 0.36                         | 7.44                         | 11.17                        |

| TCGA-55-7910-01A-11H-2169-13 | TCGA-55-7911-01A-11H-2169-13 | TCGA-55-7913-01B-11H-2240-13 | TCGA-55-7914-01A-11H-2169-13 | TCGA-55-7994-01A-11H-2186-13 | TCGA-55-7995-01A-11H-2186-13 | TCGA-55-8085-01A-11H-2240-13 | TCGA-55-8087-01A-11H-2240-13 | TCGA-55-8089-01A-11H-2240-13 |
|------------------------------|------------------------------|------------------------------|------------------------------|------------------------------|------------------------------|------------------------------|------------------------------|------------------------------|
| 9.31                         | 2                            | 2.29                         | 6.38                         | 8.81                         | 1.67                         | 6.85                         | 3.61                         | 1.32                         |



|                              |                              |                              |                              |                              |                              |                              |                              |                              |
|------------------------------|------------------------------|------------------------------|------------------------------|------------------------------|------------------------------|------------------------------|------------------------------|------------------------------|
|                              |                              |                              |                              |                              |                              |                              |                              |                              |
| TCGA-55-8090-01A-11H-2240-13 | TCGA-55-8091-01A-11H-2240-13 | TCGA-55-8092-01A-11H-2240-13 | TCGA-55-8094-01A-11H-2240-13 | TCGA-55-8096-01A-11H-2240-13 | TCGA-55-8097-01A-11H-2240-13 | TCGA-55-8203-01A-11H-2240-13 | TCGA-55-8204-01A-11H-2240-13 | TCGA-55-8205-01A-11H-2240-13 |
| 2.66                         | 1.17                         | 1.89                         | 11.94                        | 4.53                         | 1.58                         | 2.62                         | 2.11                         | 1.31                         |

| TCGA-55-8206-01A-11H-2240-13 | TCGA-55-8207-01A-11H-2240-13 | TCGA-55-8208-01A-11H-2240-13 | TCGA-55-8299-01A-11H-2286-13 | TCGA-55-8301-01A-11H-2286-13 | TCGA-55-8302-01A-11H-2325-13 | TCGA-55-8505-01A-11H-2402-13 | TCGA-55-8506-01A-11H-2402-13 | TCGA-55-8507-01A-11H-2402-13 |
|------------------------------|------------------------------|------------------------------|------------------------------|------------------------------|------------------------------|------------------------------|------------------------------|------------------------------|
| 2.42                         | 6.25                         | 3.55                         | 2.43                         | 3.54                         | 1.14                         | 4.19                         | 1.45                         | 9.45                         |

|                              |                              |                              |                              |                              |                              |                              |                              |                              |
|------------------------------|------------------------------|------------------------------|------------------------------|------------------------------|------------------------------|------------------------------|------------------------------|------------------------------|
|                              |                              |                              |                              |                              |                              |                              |                              |                              |
| TCGA-55-8508-01A-11H-2402-13 | TCGA-55-8510-01A-11H-2402-13 | TCGA-55-8511-01A-11H-2402-13 | TCGA-55-8512-01A-11H-2402-13 | TCGA-55-8513-01A-11H-2402-13 | TCGA-55-8514-01A-11H-2402-13 | TCGA-55-8614-01A-11H-2402-13 | TCGA-55-8615-01A-11H-2402-13 | TCGA-55-8616-01A-11H-2402-13 |
| 1.84                         | 1.96                         | 5.48                         | 2.47                         | 1.89                         | 1.33                         | 2.15                         | 2.96                         | 4.82                         |

| TCGA-55-8619-01A-11H-2402-13 | TCGA-55-8620-01A-11H-2402-13 | TCGA-55-8621-01A-11H-2402-13 | TCGA-55-A48X-01A-11H-A24G-13 | TCGA-55-A48Y-01A-11H-A24G-13 | TCGA-55-A48Z-01A-12H-A24S-13 | TCGA-55-A490-01A-11H-A24G-13 | TCGA-55-A491-01A-11H-A24G-13 | TCGA-55-A492-01A-11H-A24G-13 |
|------------------------------|------------------------------|------------------------------|------------------------------|------------------------------|------------------------------|------------------------------|------------------------------|------------------------------|
| 1.82                         | 2.62                         | 0.25                         | 2.59                         | 2.28                         | 3.35                         | 5.61                         | 1.39                         | 1.83                         |

| TCGA-55-A493-01A-11H-A24G-13 | TCGA-55-A494-01A-11H-A24S-13 | TCGA-55-A4DF-01A-11H-A24G-13 | TCGA-55-A4DG-01A-11H-A24G-13 | TCGA-55-A57B-01A-12H-A39B-13 | TCGA-62-8394-01A-11H-2325-13 | TCGA-62-8395-01A-11H-2325-13 | TCGA-62-8397-01A-11H-2325-13 | TCGA-62-8398-01A-11H-2325-13 |
|------------------------------|------------------------------|------------------------------|------------------------------|------------------------------|------------------------------|------------------------------|------------------------------|------------------------------|
| 4.19                         | 7.21                         | 3.4                          | 6.22                         | 4.01                         | 4.95                         | 1.13                         | 2.04                         | 3.23                         |

| TCGA-62-8399-01A-21H-2325-13 | TCGA-62-8402-01A-11H-2325-13 | TCGA-62-A46O-01A-11H-A24G-13 | TCGA-62-A46P-01A-11H-A24G-13 | TCGA-62-A46R-01A-11H-A24G-13 | TCGA-62-A46S-01A-11H-A24G-13 | TCGA-62-A46U-01A-11H-A24G-13 | TCGA-62-A46V-01A-11H-A24G-13 | TCGA-62-A46Y-01A-11H-A24G-13 |
|------------------------------|------------------------------|------------------------------|------------------------------|------------------------------|------------------------------|------------------------------|------------------------------|------------------------------|
| 3.94                         | 6.23                         | 2.73                         | 1.37                         | 0.95                         | 4.17                         | 2.6                          | 2.09                         | 7.34                         |

| Tumor                        |                              |                              |                              |                              |                              |                              |                              |                              |
|------------------------------|------------------------------|------------------------------|------------------------------|------------------------------|------------------------------|------------------------------|------------------------------|------------------------------|
| TCGA-62-A470-01A-11H-A24G-13 | TCGA-62-A471-01A-12H-A24G-13 | TCGA-62-A472-01A-11H-A24G-13 | TCGA-64-1679-01A-21H-2065-13 | TCGA-64-1681-01A-11H-2065-13 | TCGA-64-5774-01A-01T-1627-13 | TCGA-64-5775-01A-01T-1627-13 | TCGA-64-5778-01A-01T-1627-13 | TCGA-64-5779-01A-01T-1627-13 |
| 6.52                         | 1.33                         | 0.94                         | 3.04                         | 2.5                          | 1.24                         | 4.44                         | 2.38                         | 6.76                         |

| TCGA-64-5781-01A-01T-1627-13 | TCGA-64-5815-01A-01T-1627-13 | TCGA-67-4679-01B-01T-1754-13 | TCGA-67-6215-01A-11H-1754-13 | TCGA-67-6216-01A-11H-1754-13 | TCGA-67-6217-01A-11H-1754-13 | TCGA-69-7760-01A-11H-2169-13 | TCGA-69-7761-01A-11H-2169-13 | TCGA-69-7763-01A-11H-2169-13 |
|------------------------------|------------------------------|------------------------------|------------------------------|------------------------------|------------------------------|------------------------------|------------------------------|------------------------------|
| 0.77                         | 0.57                         | 2.51                         | 2.67                         | 0.45                         | 8.31                         | 2.35                         | 2.12                         | 1.95                         |



| TCGA-69-7764-01A-11H-2169-13 | TCGA-69-7765-01A-11H-2169-13 | TCGA-69-7973-01A-11H-2186-13 | TCGA-69-7974-01A-11H-2186-13 | TCGA-69-7978-01A-11H-2186-13 | TCGA-69-7979-01A-11H-2186-13 | TCGA-69-7980-01A-11H-2186-13 | TCGA-69-8253-01A-11H-2286-13 | TCGA-69-8254-01A-11H-2286-13 |
|------------------------------|------------------------------|------------------------------|------------------------------|------------------------------|------------------------------|------------------------------|------------------------------|------------------------------|
| 1.31                         | 3.79                         | 2.64                         | 1.23                         | 2.31                         | 12.42                        | 5.84                         | 1.19                         | 3.74                         |

| TCGA-69-8255-01A-11H-2286-13 | TCGA-69-8453-01A-12H-2325-13 | TCGA-69-A59K-01A-11H-A263-13 | TCGA-71-6725-01A-11H-1857-13 | TCGA-71-8520-01A-11H-2402-13 | TCGA-73-4658-01A-01T-1754-13 | TCGA-73-4676-01A-01T-1754-13 | TCGA-73-7498-01A-12H-2186-13 | TCGA-73-7499-01A-11H-2186-13 |
|------------------------------|------------------------------|------------------------------|------------------------------|------------------------------|------------------------------|------------------------------|------------------------------|------------------------------|
| 5.84                         | 4.3                          | 1.89                         | 2.66                         | 2.16                         | 0.57                         | 0.93                         | 6.57                         | 2.17                         |

| TCGA-73-A9RS-01A-11H-A41D-13 | TCGA-75-5122-01A-01T-1754-13 | TCGA-75-5125-01A-01T-1754-13 | TCGA-75-5126-01A-01T-1754-13 | TCGA-75-5146-01A-01T-1627-13 | TCGA-75-5147-01A-01T-1627-13 | TCGA-75-6203-01A-11H-1754-13 | TCGA-75-6205-01A-11H-1754-13 | TCGA-75-6206-01A-11H-1754-13 |
|------------------------------|------------------------------|------------------------------|------------------------------|------------------------------|------------------------------|------------------------------|------------------------------|------------------------------|
| 2.35                         | 1.29                         | 2                            | 1.7                          | 0.98                         | 3.44                         | 1.79                         | 3.46                         | 4.84                         |

| TCGA-75-6207-01A-11H-1754-13 | TCGA-75-6211-01A-11H-1754-13 | TCGA-75-6212-01A-11H-1754-13 | TCGA-75-6214-01A-41H-1948-13 | TCGA-75-7025-01A-12H-1948-13 | TCGA-75-7027-01A-11H-1948-13 | TCGA-75-7030-01A-11H-1948-13 | TCGA-75-7031-01A-11H-1948-13 | TCGA-78-7143-01A-11H-2038-13 |
|------------------------------|------------------------------|------------------------------|------------------------------|------------------------------|------------------------------|------------------------------|------------------------------|------------------------------|
| 2.48                         | 4.39                         | 2.2                          | 11.13                        | 3.68                         | 2.67                         | 0.94                         | 27.33                        | 2.76                         |

|                              |                              |                              |                              |                              |                              |                              |                              |                              |
|------------------------------|------------------------------|------------------------------|------------------------------|------------------------------|------------------------------|------------------------------|------------------------------|------------------------------|
|                              |                              |                              |                              |                              |                              |                              |                              |                              |
| TCGA-78-7145-01A-11H-2038-13 | TCGA-78-7146-01A-11H-2038-13 | TCGA-78-7147-01A-11H-2038-13 | TCGA-78-7148-01A-11H-2038-13 | TCGA-78-7149-01A-11H-2038-13 | TCGA-78-7150-01A-21H-2038-13 | TCGA-78-7152-01A-11H-2038-13 | TCGA-78-7153-01A-11H-2038-13 | TCGA-78-7154-01A-11H-2038-13 |
| 2.23                         | 5.88                         | 3.88                         | 1.71                         | 8.07                         | 1.75                         | 1.01                         | 2.45                         | 3.08                         |

| TCGA-78-7155-01A-11H-2038-13 | TCGA-78-7156-01A-11H-2038-13 | TCGA-78-7158-01A-11H-2038-13 | TCGA-78-7159-01A-11H-2038-13 | TCGA-78-7160-01A-11H-2038-13 | TCGA-78-7161-01A-11H-2038-13 | TCGA-78-7162-01A-21H-2065-13 | TCGA-78-7163-01A-12H-2065-13 | TCGA-78-7166-01A-12H-2065-13 |
|------------------------------|------------------------------|------------------------------|------------------------------|------------------------------|------------------------------|------------------------------|------------------------------|------------------------------|
| 6.66                         | 2.04                         | 0.47                         | 14.27                        | 2.24                         | 6.49                         | 4.94                         | 5.33                         | 1.66                         |

| TCGA-78-7167-01A-11H-2065-13 | TCGA-78-7220-01A-11H-2038-13 | TCGA-78-7535-01A-11H-2065-13 | TCGA-78-7536-01A-11H-2065-13 | TCGA-78-7537-01A-11H-2065-13 | TCGA-78-7539-01A-11H-2065-13 | TCGA-78-7540-01A-11H-2065-13 | TCGA-78-7542-01A-21H-2065-13 | TCGA-78-7633-01A-11H-2065-13 |
|------------------------------|------------------------------|------------------------------|------------------------------|------------------------------|------------------------------|------------------------------|------------------------------|------------------------------|
| 3.47                         | 3.55                         | 3.62                         | 4.51                         | 2.65                         | 1.57                         | 1.77                         | 3.6                          | 3.12                         |

| TCGA-78-8640-01A-11H-2402-13 | TCGA-78-8648-01A-11H-2402-13 | TCGA-78-8655-01A-11H-2402-13 | TCGA-78-8660-01A-11H-2402-13 | TCGA-78-8662-01A-11H-2402-13 | TCGA-80-5607-01A-31H-1948-13 | TCGA-80-5608-01A-31H-1948-13 | TCGA-80-5611-01A-01T-1627-13 | TCGA-83-5908-01A-21H-2286-13 |
|------------------------------|------------------------------|------------------------------|------------------------------|------------------------------|------------------------------|------------------------------|------------------------------|------------------------------|
| 4.34                         | 2.02                         | 0.92                         | 5.14                         | 7.4                          | 12.03                        | 9.29                         | 6.83                         | 4.22                         |



| TCGA-86-6562-01A-11H-1754-13 | TCGA-86-6851-01A-11H-1948-13 | TCGA-86-7701-01A-11H-2169-13 | TCGA-86-7711-01A-11H-2065-13 | TCGA-86-7713-01A-11H-2065-13 | TCGA-86-7714-01A-12H-2169-13 | TCGA-86-7953-01A-11H-2186-13 | TCGA-86-7954-01A-11H-2186-13 | TCGA-86-7955-01A-11H-2186-13 |
|------------------------------|------------------------------|------------------------------|------------------------------|------------------------------|------------------------------|------------------------------|------------------------------|------------------------------|
| 1.56                         | 5.81                         | 2                            | 6.51                         | 4.36                         | 1.6                          | 2.37                         | 5.86                         | 6.41                         |

| TCGA-86-8054-01A-11H-2240-13 | TCGA-86-8055-01A-11H-2240-13 | TCGA-86-8056-01A-11H-2240-13 | TCGA-86-8073-01A-11H-2240-13 | TCGA-86-8074-01A-11H-2240-13 | TCGA-86-8075-01A-11H-2240-13 | TCGA-86-8076-01A-31H-2240-13 | TCGA-86-8278-01A-11H-2286-13 | TCGA-86-8279-01A-11H-2286-13 |
|------------------------------|------------------------------|------------------------------|------------------------------|------------------------------|------------------------------|------------------------------|------------------------------|------------------------------|
| 5.74                         | 2.75                         | 1.36                         | 2.12                         | 4.6                          | 4.52                         | 2.36                         | 1                            | 6.27                         |

| TCGA-86-8280-01A-11H-2286-13 | TCGA-86-8281-01A-11H-2286-13 | TCGA-86-8358-01A-11H-2325-13 | TCGA-86-8359-01A-11H-2325-13 | TCGA-86-8585-01A-11H-2402-13 | TCGA-86-8668-01A-11H-2402-13 | TCGA-86-8669-01A-11H-2402-13 | TCGA-86-8671-01A-11H-2402-13 | TCGA-86-8672-01A-21H-2402-13 |
|------------------------------|------------------------------|------------------------------|------------------------------|------------------------------|------------------------------|------------------------------|------------------------------|------------------------------|
| 2.69                         | 1.22                         | 12.18                        | 1.24                         | 3.29                         | 1.74                         | 0.68                         | 2.55                         | 1.47                         |

| TCGA-86-8673-01A-11H-2402-13 | TCGA-86-8674-01A-21H-2402-13 | TCGA-86-A456-01A-11H-A24G-13 | TCGA-86-A4D0-01A-11H-A24G-13 | TCGA-86-A4JF-01A-11H-A24S-13 | TCGA-86-A4P7-01A-11H-A24S-13 | TCGA-86-A4P8-01A-11H-A24S-13 | TCGA-91-6828-01A-11H-1857-13 | TCGA-91-6829-01A-21H-1857-13 |
|------------------------------|------------------------------|------------------------------|------------------------------|------------------------------|------------------------------|------------------------------|------------------------------|------------------------------|
| 1.34                         | 1.98                         | 2.19                         | 10.88                        | 3.7                          | 1.88                         | 1.8                          | 4.31                         | 2.69                         |

| TCGA-91-6830-01A-11H-1948-13 | TCGA-91-6831-01A-11H-1857-13 | TCGA-91-6835-01A-11H-1857-13 | TCGA-91-6836-01A-21H-1857-13 | TCGA-91-6840-01A-11H-1948-13 | TCGA-91-6847-01A-11H-1948-13 | TCGA-91-6848-01A-11H-1948-13 | TCGA-91-6849-01A-11H-1948-13 | TCGA-91-7771-01A-11H-2169-13 |
|------------------------------|------------------------------|------------------------------|------------------------------|------------------------------|------------------------------|------------------------------|------------------------------|------------------------------|
| 3.97                         | 3.62                         | 1.68                         | 3.65                         | 21.66                        | 6.49                         | 7.13                         | 1.84                         | 3.01                         |

| TCGA-91-8496-01A-11H-2402-13 | TCGA-91-8497-01A-11H-2402-13 | TCGA-91-8499-01A-11H-2402-13 | TCGA-91-A4BC-01A-11R-A24G-13 | TCGA-91-A4BD-01A-11R-A24G-13 | TCGA-93-7347-01A-11H-2186-13 | TCGA-93-7348-01A-21H-2038-13 | TCGA-93-8067-01A-11H-2286-13 | TCGA-93-A4JN-01A-11H-A24S-13 |
|------------------------------|------------------------------|------------------------------|------------------------------|------------------------------|------------------------------|------------------------------|------------------------------|------------------------------|
| 0.78                         | 1.66                         | 4.34                         | 2.42                         | 1.61                         | 1.23                         | 2.21                         | 2.58                         | 1.67                         |

| TCGA-93-A4JO-01A-21H-A24S-13 | TCGA-93-A4JP-01A-11H-A24S-13 | TCGA-93-A4JQ-01A-11H-A24S-13 | TCGA-95-7039-01A-11H-1948-13 | TCGA-95-7043-01A-11H-1948-13 | TCGA-95-7562-01A-11H-2240-13 | TCGA-95-7567-01A-11H-2065-13 | TCGA-95-7944-01A-11H-2186-13 | TCGA-95-7947-01A-11H-2186-13 |
|------------------------------|------------------------------|------------------------------|------------------------------|------------------------------|------------------------------|------------------------------|------------------------------|------------------------------|
| 0.97                         | 5.24                         | 4.68                         | 3.88                         | 2.64                         | 13.04                        | 3.84                         | 0.68                         | 1.91                         |

| TCGA-95-7948-01A-11H-2186-13 | TCGA-95-8039-01A-11H-2240-13 | TCGA-95-8494-01A-11H-2325-13 | TCGA-95-A4VK-01A-11H-A263-13 | TCGA-95-A4VN-01A-11H-A263-13 | TCGA-95-A4VP-01A-21H-A263-13 | TCGA-97-7546-01A-11H-2038-13 | TCGA-97-7547-01A-11H-2038-13 | TCGA-97-7552-01A-11H-2038-13 |
|------------------------------|------------------------------|------------------------------|------------------------------|------------------------------|------------------------------|------------------------------|------------------------------|------------------------------|
| 2.62                         | 3.17                         | 1.04                         | 1.05                         | 2.07                         | 3.61                         | 2.84                         | 1.94                         | 1.64                         |



| TCGA-97-7553-01A-21H-2038-13 | TCGA-97-7554-01A-11H-2038-13 | TCGA-97-7937-01A-11H-2169-13 | TCGA-97-7938-01A-11H-2169-13 | TCGA-97-7941-01A-11H-2186-13 | TCGA-97-8171-01A-11H-2286-13 | TCGA-97-8172-01A-11H-2286-13 | TCGA-97-8174-01A-11H-2286-13 | TCGA-97-8175-01A-11H-2286-13 |
|------------------------------|------------------------------|------------------------------|------------------------------|------------------------------|------------------------------|------------------------------|------------------------------|------------------------------|
| 1.43                         | 3.73                         | 2.6                          | 1.17                         | 1.09                         | 4.38                         | 1.28                         | 2.79                         | 1.72                         |

| TCGA-97-8176-01A-11H-2402-13 | TCGA-97-8177-01A-11H-2286-13 | TCGA-97-8179-01A-11H-2286-13 | TCGA-97-8547-01A-11H-2402-13 | TCGA-97-8552-01A-11H-2402-13 | TCGA-97-A4LX-01A-11H-A24S-13 | TCGA-97-A4M0-01A-11H-A24S-13 | TCGA-97-A4M1-01A-11H-A24S-13 | TCGA-97-A4M2-01A-12H-A24S-13 |
|------------------------------|------------------------------|------------------------------|------------------------------|------------------------------|------------------------------|------------------------------|------------------------------|------------------------------|
| 2.04                         | 0.52                         | 4.09                         | 0.77                         | 2.01                         | 1.57                         | 0.68                         | 1.32                         | 2.83                         |

| TCGA-97-A4M3-01A-11H-A24S-13 | TCGA-97-A4M5-01A-11H-A24S-13 | TCGA-97-A4M6-01A-11H-A24S-13 | TCGA-97-A4M7-01A-11H-A24S-13 | TCGA-99-7458-01A-11H-2038-13 | TCGA-99-8025-01A-11H-2240-13 | TCGA-99-8028-01A-11H-2240-13 | TCGA-99-8032-01A-11H-2240-13 | TCGA-99-8033-01A-11H-2240-13 |
|------------------------------|------------------------------|------------------------------|------------------------------|------------------------------|------------------------------|------------------------------|------------------------------|------------------------------|
| 2.9                          | 0.64                         | 0.98                         | 1.88                         | 2.55                         | 1.71                         | 0.96                         | 4.07                         | 2.39                         |

| TCGA-99-AA5R-01A-11H-A39B-13 | TCGA-J2-8192-01A-11H-2240-13 | TCGA-J2-8194-01A-11H-2240-13 | TCGA-J2-A4AD-01A-11R-A24G-13 | TCGA-J2-A4AE-01A-21R-A24G-13 | TCGA-J2-A4AG-01A-11H-A24G-13 | TCGA-L4-A4E5-01A-11H-A24S-13 | TCGA-L4-A4E6-01A-11R-A24G-13 | TCGA-L9-A443-01A-12H-A24G-13 |
|------------------------------|------------------------------|------------------------------|------------------------------|------------------------------|------------------------------|------------------------------|------------------------------|------------------------------|
| 2.32                         | 2.43                         | 3.88                         | 4.67                         | 2.64                         | 0.91                         | 4.48                         | 1.93                         | 1.25                         |

| TCGA-L9-A444-01A-21H-A24G-13 | TCGA-L9-A50W-01A-12H-A39B-13 | TCGA-L9-A5IP-01A-21H-A39B-13 | TCGA-L9-A743-01A-43H-A39B-13 | TCGA-L9-A7SV-01A-11H-A39B-13 | TCGA-L9-A8F4-01A-11H-A39B-13 | TCGA-MN-A4N1-01A-11H-A24S-13 | TCGA-MN-A4N4-01A-12H-A24S-13 | TCGA-MN-A4N5-01A-11H-A24S-13 |
|------------------------------|------------------------------|------------------------------|------------------------------|------------------------------|------------------------------|------------------------------|------------------------------|------------------------------|
| 3.29                         | 3                            | 0.88                         | 2.51                         | 1.95                         | 3.51                         | 3.88                         | 1.37                         | 2.39                         |

| TCGA-MP-A4SV-01A-11H-A24S-13 | TCGA-MP-A4SW-01A-21H-A24S-13 | TCGA-MP-A4SY-01A-21H-A24S-13 | TCGA-MP-A4T2-01A-11H-A24S-13 | TCGA-MP-A4T4-01A-11H-A263-13 | TCGA-MP-A4T6-01A-32H-A263-13 | TCGA-MP-A4T7-01A-11H-A24S-13 | TCGA-MP-A4T8-01A-11H-A24S-13 | TCGA-MP-A4T9-01A-11H-A24S-13 |
|------------------------------|------------------------------|------------------------------|------------------------------|------------------------------|------------------------------|------------------------------|------------------------------|------------------------------|
| 4.14                         | 2.21                         | 1.84                         | 0.66                         | 1.92                         | 7.32                         | 4.15                         | 0.98                         | 2.24                         |

| TCGA-MP-A4TA-01A-21H-A24S-13 | TCGA-MP-A4TC-01A-11H-A24S-13 | TCGA-MP-A4TD-01A-32H-A263-13 | TCGA-MP-A4TE-01A-22H-A263-13 | TCGA-MP-A4TF-01A-11H-A263-13 | TCGA-MP-A4TH-01A-31H-A263-13 | TCGA-MP-A4TI-01A-21H-A24S-13 | TCGA-MP-A4TJ-01A-51H-A263-13 | TCGA-MP-A4TK-01A-11H-A24S-13 |
|------------------------------|------------------------------|------------------------------|------------------------------|------------------------------|------------------------------|------------------------------|------------------------------|------------------------------|
| 8.83                         | 2.37                         | 1.57                         | 3.7                          | 4.23                         | 5.74                         | 1.36                         | 2.69                         | 2.91                         |

| TCGA-MP-A5C7-01A-11H-A263-13 | TCGA-NJ-A4YF-01A-12H-A263-13 | TCGA-NJ-A4YG-01A-22H-A263-13 | TCGA-NJ-A4YI-01A-11H-A263-13 | TCGA-NJ-A4YP-01A-11H-A263-13 | TCGA-NJ-A4YQ-01A-11H-A263-13 | TCGA-NJ-A55A-01A-11H-A263-13 | TCGA-NJ-A55O-01A-11H-A263-13 | TCGA-NJ-A55R-01A-11H-A263-13 |
|------------------------------|------------------------------|------------------------------|------------------------------|------------------------------|------------------------------|------------------------------|------------------------------|------------------------------|
| 4.37                         | 10.95                        | 2.22                         | 1.27                         | 1.76                         | 1.15                         | 1.68                         | 3.57                         | 3.12                         |



| TCGA-<br>NJ-<br>A7XG-<br>01A-<br>12H-<br>A39B-13 | TCGA-<br>O1-<br>A52J-<br>01A-<br>11H-<br>A263-13 | TCGA-<br>S2-<br>AA1A-<br>01A-<br>12H-<br>A39B-13 |
|--------------------------------------------------|--------------------------------------------------|--------------------------------------------------|
| 0.89                                             | 9.98                                             | 1.89                                             |

| Normal | Lung cancer |
|--------|-------------|
| 42.47  | 2.14        |
| 65.08  | 5.08        |
| 45.57  | 3.76        |
| 25.1   | 1.53        |
| 80.56  | 1.31        |
| 25.04  | 8.13        |
| 18.59  | 4.11        |
| 1.04   | 11.19       |
| 1.3    | 2.77        |
| 1.14   | 0.3         |
| 0.63   | 2.81        |
| 0.77   | 0.84        |
| 1.12   | 0.98        |
| 0.48   | 1.17        |
| 0.76   | 1.06        |
| 0.4    | 0.56        |
| 0.83   | 5.12        |
| 0.63   | 1.84        |
| 0.68   | 26.6        |
| 1.14   | 4.06        |
| 1.6    | 4.76        |
| 0.89   | 1.4         |
| 0.48   | 0.32        |
| 1      | 3.64        |
| 0.38   | 11.44       |
| 1.02   | 1.05        |
| 0.7    | 10.03       |
| 1.23   | 2.71        |
| 0.73   | 8.87        |
| 1.79   | 4.16        |
| 1.99   | 6.74        |
| 0.67   | 4.74        |
| 0.66   | 5.95        |
| 0.91   | 9.89        |
| 0.41   | 1.45        |
| 2.58   | 2.3         |
| 1.26   | 2           |
| 2.04   | 1.8         |
| 0.29   | 14.04       |
| 1.21   | 1.08        |
| 0.5    | 0.1         |
| 1.6    | 0.93        |
| 0.8    | 0.1         |

|      |       |
|------|-------|
| 1.68 | 1.02  |
| 1.32 | 5.84  |
| 1.06 | 3.5   |
|      | 2.36  |
|      | 8.11  |
|      | 7.91  |
|      | 8.47  |
|      | 2.25  |
|      | 1.85  |
|      | 2.6   |
|      | 3.32  |
|      | 4.97  |
|      | 1.56  |
|      | 1.29  |
|      | 1.41  |
|      | 1.9   |
|      | 2.12  |
|      | 1.81  |
|      | 6.44  |
|      | 2.05  |
|      | 8.42  |
|      | 2.58  |
|      | 5.68  |
|      | 8.54  |
|      | 1.31  |
|      | 2.47  |
|      | 1.13  |
|      | 0.62  |
|      | 2.44  |
|      | 3.84  |
|      | 2.31  |
|      | 3.15  |
|      | 10.02 |
|      | 2.11  |
|      | 1.99  |
|      | 2.6   |
|      | 2.33  |
|      | 1.63  |
|      | 1.18  |
|      | 4.45  |
|      | 2.44  |
|      | 5.69  |
|      | 1.4   |
|      | 0.66  |

|       |
|-------|
| 1.39  |
| 1.87  |
| 1.88  |
| 1.41  |
| 2.65  |
| 0.74  |
| 3.13  |
| 3.17  |
| 8.44  |
| 3.77  |
| 0.94  |
| 2.79  |
| 2.03  |
| 2.77  |
| 4.68  |
| 2.59  |
| 2.24  |
| 5.56  |
| 11.94 |
| 2.75  |
| 42.82 |
| 1.93  |
| 2.98  |
| 1.39  |
| 2.45  |
| 2.36  |
| 7.02  |
| 2.56  |
| 0.97  |
| 0.51  |
| 2.08  |
| 5.36  |
| 2.17  |
| 3.66  |
| 6.89  |
| 7.29  |
| 3.36  |
| 0.81  |
| 0.85  |
| 3.68  |
| 9.5   |
| 3.23  |
| 1.54  |
| 8.07  |

|       |
|-------|
| 3     |
| 2.76  |
| 2.57  |
| 7.08  |
| 4.02  |
| 2.41  |
| 1.98  |
| 5.23  |
| 4.69  |
| 2.52  |
| 3.06  |
| 0.88  |
| 3.54  |
| 1.84  |
| 10.88 |
| 6.38  |
| 2.27  |
| 0.87  |
| 1.97  |
| 2.2   |
| 1.6   |
| 6.05  |
| 1.13  |
| 2.8   |
| 0.36  |
| 7.44  |
| 11.17 |
| 9.31  |
| 2     |
| 2.29  |
| 6.38  |
| 8.81  |
| 1.67  |
| 6.85  |
| 3.61  |
| 1.32  |
| 2.66  |
| 1.17  |
| 1.89  |
| 11.94 |
| 4.53  |
| 1.58  |
| 2.62  |
| 2.11  |

|      |
|------|
| 1.31 |
| 2.42 |
| 6.25 |
| 3.55 |
| 2.43 |
| 3.54 |
| 1.14 |
| 4.19 |
| 1.45 |
| 9.45 |
| 1.84 |
| 1.96 |
| 5.48 |
| 2.47 |
| 1.89 |
| 1.33 |
| 2.15 |
| 2.96 |
| 4.82 |
| 1.82 |
| 2.62 |
| 0.25 |
| 2.59 |
| 2.28 |
| 3.35 |
| 5.61 |
| 1.39 |
| 1.83 |
| 4.19 |
| 7.21 |
| 3.4  |
| 6.22 |
| 4.01 |
| 4.95 |
| 1.13 |
| 2.04 |
| 3.23 |
| 3.94 |
| 6.23 |
| 2.73 |
| 1.37 |
| 0.95 |
| 4.17 |
| 2.6  |

|       |
|-------|
| 2.09  |
| 7.34  |
| 6.52  |
| 1.33  |
| 0.94  |
| 3.04  |
| 2.5   |
| 1.24  |
| 4.44  |
| 2.38  |
| 6.76  |
| 0.77  |
| 0.57  |
| 2.51  |
| 2.67  |
| 0.45  |
| 8.31  |
| 2.35  |
| 2.12  |
| 1.95  |
| 1.31  |
| 3.79  |
| 2.64  |
| 1.23  |
| 2.31  |
| 12.42 |
| 5.84  |
| 1.19  |
| 3.74  |
| 5.84  |
| 4.3   |
| 1.89  |
| 2.66  |
| 2.16  |
| 0.57  |
| 0.93  |
| 6.57  |
| 2.17  |
| 2.35  |
| 1.29  |
| 2     |
| 1.7   |
| 0.98  |
| 3.44  |

|       |
|-------|
| 1.79  |
| 3.46  |
| 4.84  |
| 2.48  |
| 4.39  |
| 2.2   |
| 11.13 |
| 3.68  |
| 2.67  |
| 0.94  |
| 27.33 |
| 2.76  |
| 2.23  |
| 5.88  |
| 3.88  |
| 1.71  |
| 8.07  |
| 1.75  |
| 1.01  |
| 2.45  |
| 3.08  |
| 6.66  |
| 2.04  |
| 0.47  |
| 14.27 |
| 2.24  |
| 6.49  |
| 4.94  |
| 5.33  |
| 1.66  |
| 3.47  |
| 3.55  |
| 3.62  |
| 4.51  |
| 2.65  |
| 1.57  |
| 1.77  |
| 3.6   |
| 3.12  |
| 4.34  |
| 2.02  |
| 0.92  |
| 5.14  |
| 7.4   |



|       |
|-------|
| 12.03 |
| 9.29  |
| 6.83  |
| 4.22  |
| 1.56  |
| 5.81  |
| 2     |
| 6.51  |
| 4.36  |
| 1.6   |
| 2.37  |
| 5.86  |
| 6.41  |
| 5.74  |
| 2.75  |
| 1.36  |
| 2.12  |
| 4.6   |
| 4.52  |
| 2.36  |
| 1     |
| 6.27  |
| 2.69  |
| 1.22  |
| 12.18 |
| 1.24  |
| 3.29  |
| 1.74  |
| 0.68  |
| 2.55  |
| 1.47  |
| 1.34  |
| 1.98  |
| 2.19  |
| 10.88 |
| 3.7   |
| 1.88  |
| 1.8   |
| 4.31  |
| 2.69  |
| 3.97  |
| 3.62  |
| 1.68  |
| 3.65  |

|       |
|-------|
| 21.66 |
| 6.49  |
| 7.13  |
| 1.84  |
| 3.01  |
| 0.78  |
| 1.66  |
| 4.34  |
| 2.42  |
| 1.61  |
| 1.23  |
| 2.21  |
| 2.58  |
| 1.67  |
| 0.97  |
| 5.24  |
| 4.68  |
| 3.88  |
| 2.64  |
| 13.04 |
| 3.84  |
| 0.68  |
| 1.91  |
| 2.62  |
| 3.17  |
| 1.04  |
| 1.05  |
| 2.07  |
| 3.61  |
| 2.84  |
| 1.94  |
| 1.64  |
| 1.43  |
| 3.73  |
| 2.6   |
| 1.17  |
| 1.09  |
| 4.38  |
| 1.28  |
| 2.79  |
| 1.72  |
| 2.04  |
| 0.52  |
| 4.09  |

|      |
|------|
| 0.77 |
| 2.01 |
| 1.57 |
| 0.68 |
| 1.32 |
| 2.83 |
| 2.9  |
| 0.64 |
| 0.98 |
| 1.88 |
| 2.55 |
| 1.71 |
| 0.96 |
| 4.07 |
| 2.39 |
| 2.32 |
| 2.43 |
| 3.88 |
| 4.67 |
| 2.64 |
| 0.91 |
| 4.48 |
| 1.93 |
| 1.25 |
| 3.29 |
| 3    |
| 0.88 |
| 2.51 |
| 1.95 |
| 3.51 |
| 3.88 |
| 1.37 |
| 2.39 |
| 4.14 |
| 2.21 |
| 1.84 |
| 0.66 |
| 1.92 |
| 7.32 |
| 4.15 |
| 0.98 |
| 2.24 |
| 8.83 |
| 2.37 |

|       |
|-------|
| 1.57  |
| 3.7   |
| 4.23  |
| 5.74  |
| 1.36  |
| 2.69  |
| 2.91  |
| 4.37  |
| 10.95 |
| 2.22  |
| 1.27  |
| 1.76  |
| 1.15  |
| 1.68  |
| 3.57  |
| 3.12  |
| 0.89  |
| 9.98  |
| 1.89  |
