# Supplementary figures and images for: MicroRNA-877-5p Inhibits Cell Progression by Targeting FOXM1 in Lung Cancer
Source: Hindawi journal article supplement (doi:10.1155/2022/4256172), 2022-06-15

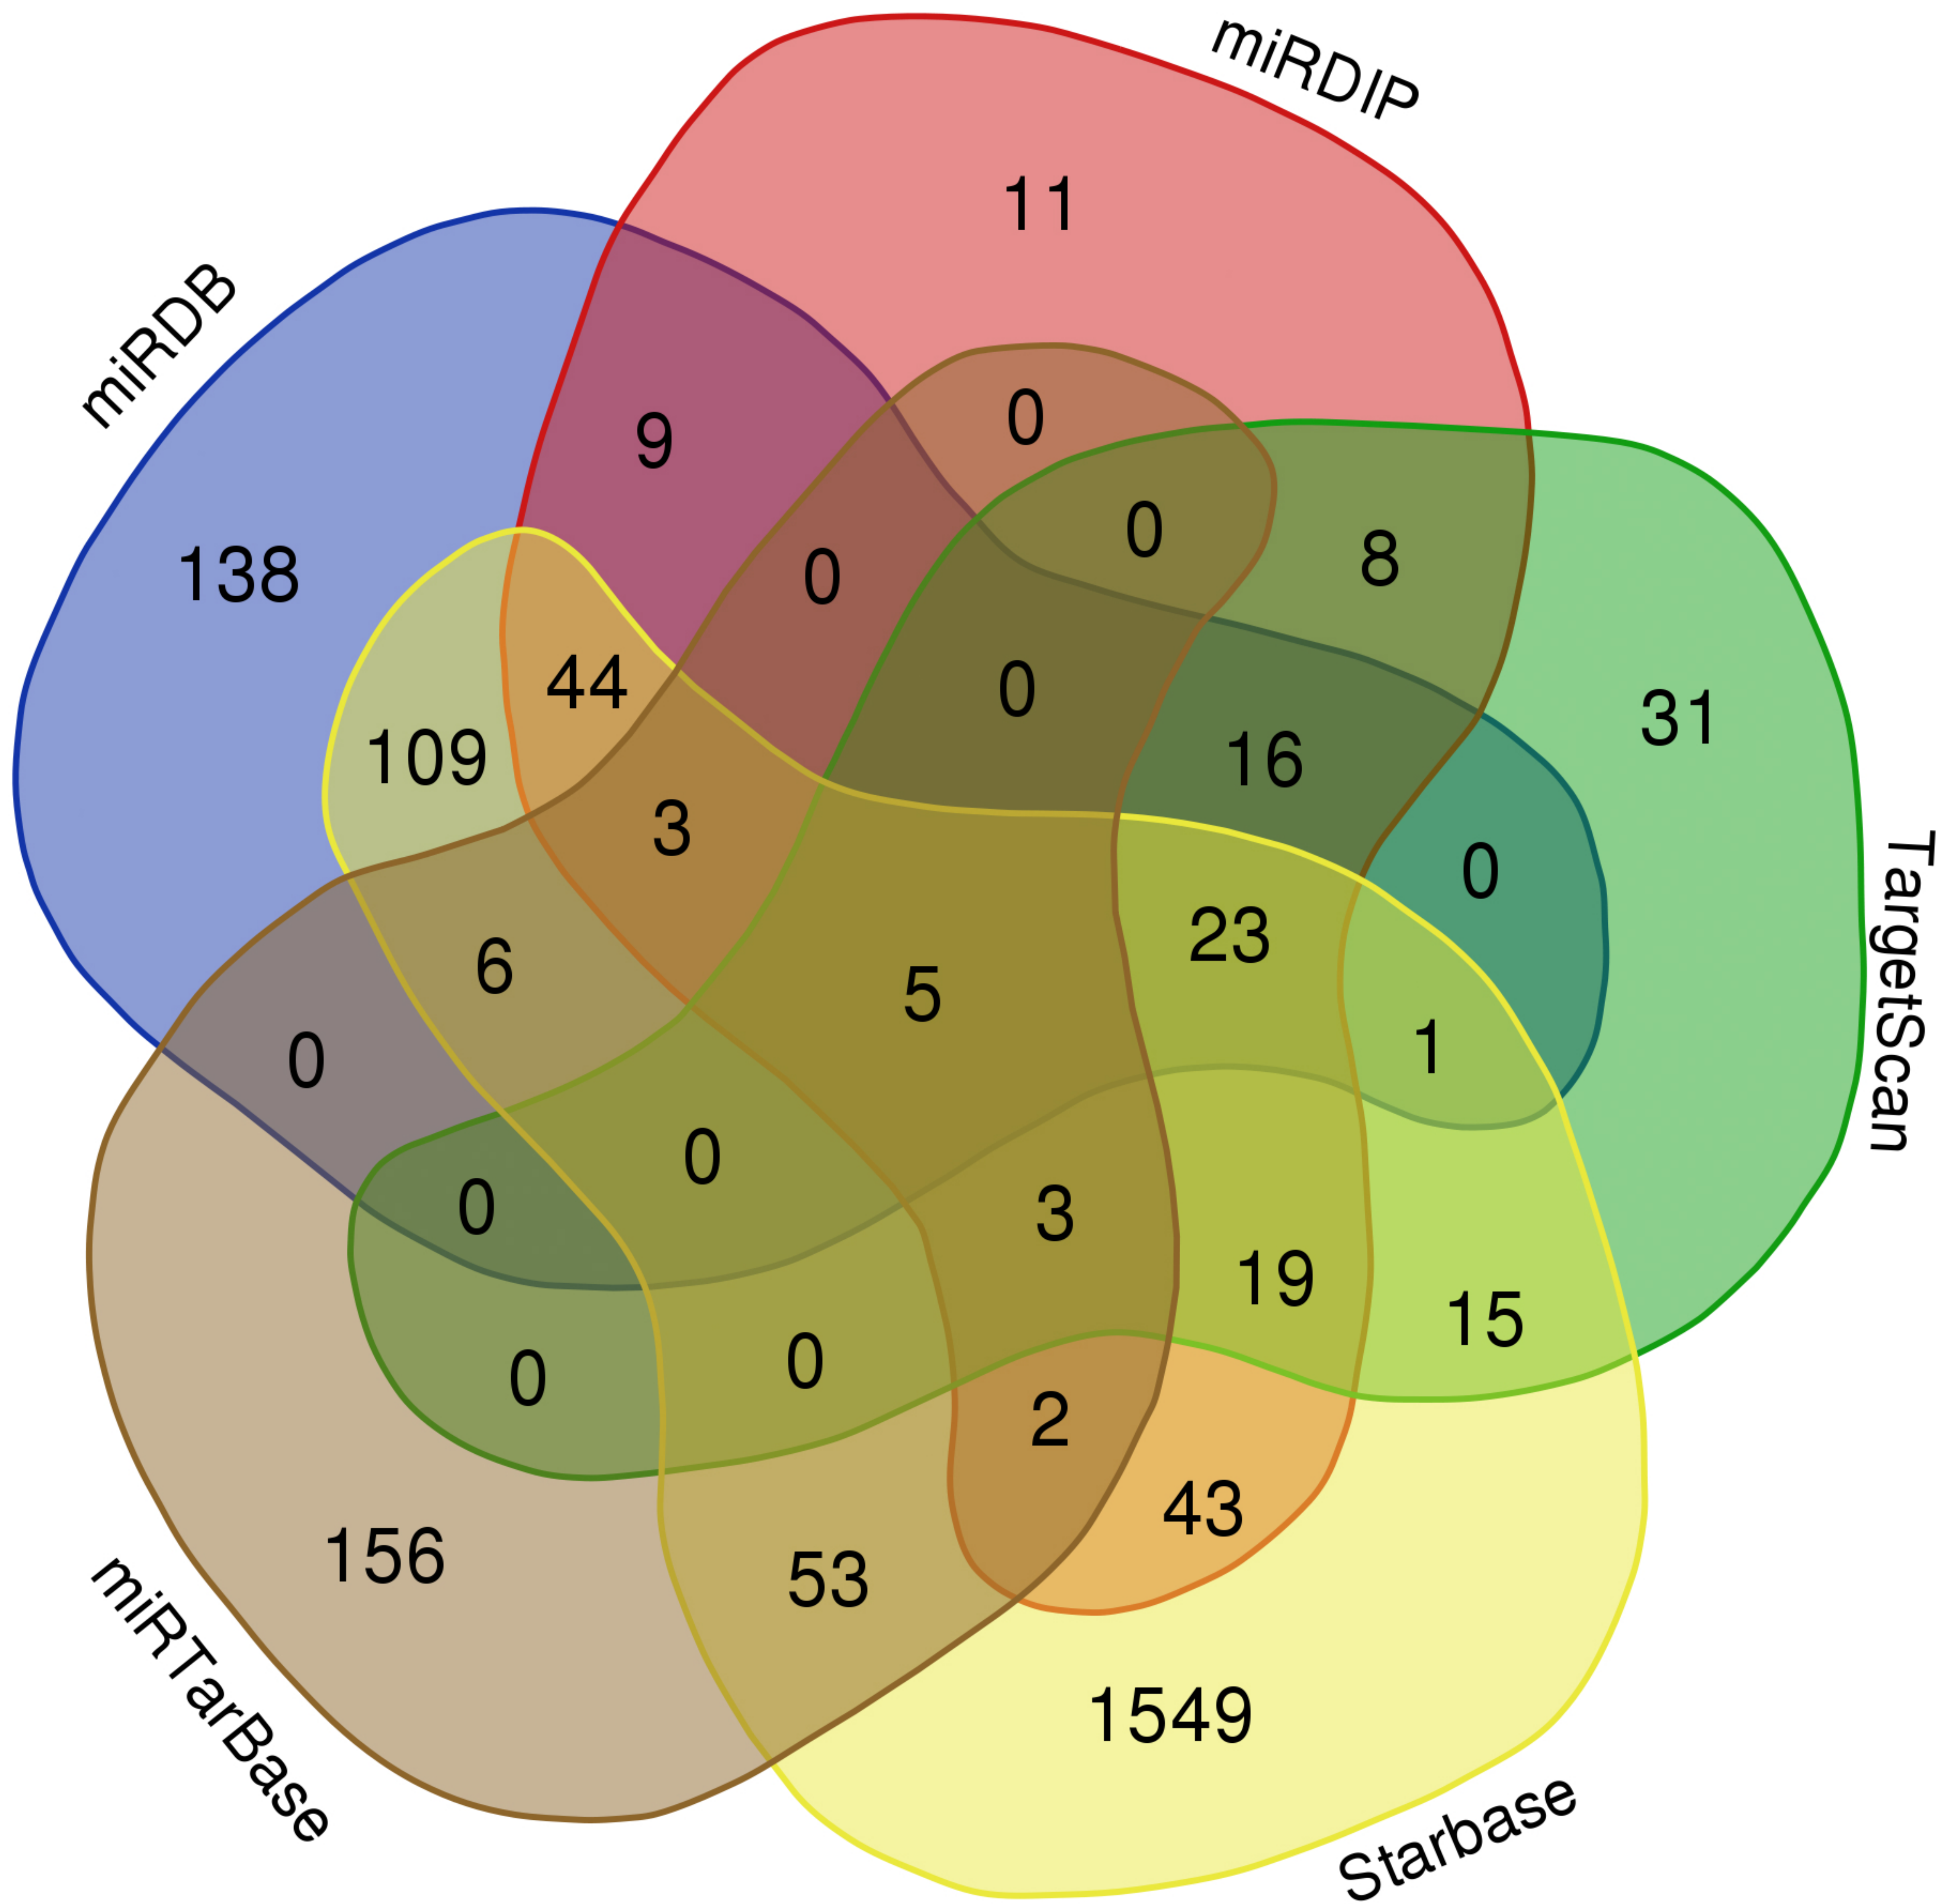

Supplement: f1 [file 4256172.f1.zip]

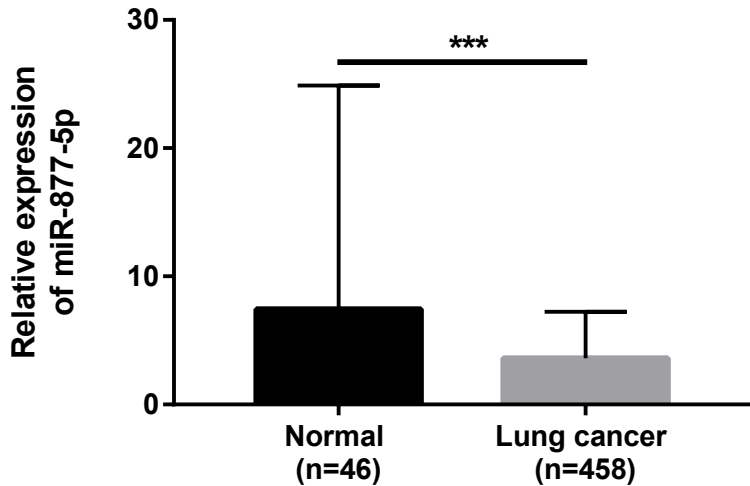

Supplement: f1 [file 4256172.f1.zip]
